# Supplementary material for: PLK4 drives centriole amplification and apical surface area expansion in multiciliated cells
Source: eLife. 2022 Aug 15;11:e80643. doi: 10.7554/eLife.80643 (PMC9507127; doi:10.7554/eLife.80643)
Supplement: Figure 1—figure supplement 1—source data 1. [file elife-80643-fig1-figsupp1-data1.xlsx]

## Sheet: Sheet1
Figure Panel	Measurement	N (mice/embryos)	Sample Name	n (cells)	Subgroup	Replicate #1	Replicate #2	Replicate #3	Replicate #4	Replicate #5	Replicate #6	Replicate #7		Figure 1 - figure supplement 1B
Figure 1-figure supplement 1D	Telencephalon area	5	Control			2.9375	3.34681	3.26353	2.7108	2.77339				Litter	# Pups	Plk4 F/F	Plk4 F/-	Plk4 -/-
		5	Plk4cKO			1.86053	1.83468	2.01817	1.72522	2.34947				GL82	6	2	4	0
Figure 1-figure supplement 1E	Centriole number in mitosis	3	Control	150	0	0	0	0						GL87	3	1	2	0
					1	0	0	0						GL94	4	1	3	0
					2	6	0	8						GL98	4	2	2	0
					3	4	16	10						GL111	4	3	1	0
					4	80	76	78						GL116	3	0	3	0
					5+	10	8	4						GL117	4	2	2	0
		3	Plk4cKO	150	0	48	42	56						GL123	1	0	1	0
					1	36	32	24						GL132	4	1	3	0
					2	14	20	18						GL139	6	2	4	0
					3	2	2	0						GL135	6	1	5	0
					4	0	4	2
					5+	0	0	0							All	Plk4 F/F	Plk4 F/-	Plk4 -/-
Figure 1-figure supplement 1F	AAV-Cre transduced cells	4	Control	1364	Day 3	26.5	30	39.2	35.5					Total pups	45	15	30	0
		7	Control	1294	Day 7	57.51	76.8	76.9	73.4	42.6	29.4	40		Expected number of pups		11.25	22.5	11.25
		5	Control	1423	Day 12	48.23	90.91	36.9	30.5	37.1				Percentage		33.3333	66.6667	0
		5	Control	1789	Day15	55.36	89.49	50.5	43.8	44.8
		4	Plk4cKO	979	Day 3	23.7	29.8	22.1	35.5	50.5
		7	Plk4cKO	1552	Day 7	72.22	59.36	69.4	66	21.7	18.8	26.5
		5	Plk4cKO	1420	Day 12	96.36	57.02	30.6	30.6	30.8
		5	Plk4cKO	1529	Day 15	75.28	73.62	69.76	38.3	34.5	38.1
