# Supplementary material for: PLK4 drives centriole amplification and apical surface area expansion in multiciliated cells
Source: eLife. 2022 Aug 15;11:e80643. doi: 10.7554/eLife.80643 (PMC9507127; doi:10.7554/eLife.80643)
Supplement: Figure 1—source data 1. [file elife-80643-fig1-data1.xlsx]

## Sheet: Sheet1
Figure Panel	Measurement	N (mice/embryos)	Sample Name	n (cells)	Subgroup	Replicate #1	Replicate #2	Replicate #3	Replicate #4	Replicate #5
1B	FOXJ1+ cells	4	Control	2397	Day 0	1.28	0.67	0.17	0
		4	Plk4cKO	2730		0.97	0.84	0.86	0.81
		4	Control	1364	Day 3	54.08	33.38	30.39	37.46
		4	Plk4cKO	1294		57.28	35.44	45.41	29.49
		3	Control	979	Day 7	36.82	55.49	49.14
		3	Plk4cKO	1552		46.56	50.92	39.42
		3	Control	988	Day 11	37.46	42.57	53.5
		3	Plk4cKO	1075		64.29	52.87	56.14
		3	Control	1566	Day 17	45	35.94	45.34
		3	Plk4cKO	1603		50.26	39.68	80.02
1C	DEUP1+ Cells	3	Control	401	Day 3	1.7	9.9	8.3
		3	Plk4cKO	661		4.3	3.1	9.1
		5	Control	1031	Day 7	11.2	11.11	12.2	19	19.9
		5	Plk4cKO	1021		8.58	6.93	9	18.17	23.3
		3	Control	885	Day 15	1.91	3.22	3.1
		3	Plk4cKO	570		1	1.15	1
1D	PLK4 intensity on deuterosomes	4	Control	56		1.02483	0.97517	1.17174	0.828261
		4	Plk4cKO	53		0.213475	0.107059	0.189685	0.342851
1F	STIL intensity on deuterosomes	3	Control	145		1	1.18368	0.816319
		3	Plk4cKO	131		0.0406296	0.0429384	0.0433656
