# Supplementary material for: PLK4 drives centriole amplification and apical surface area expansion in multiciliated cells
Source: eLife. 2022 Aug 15;11:e80643. doi: 10.7554/eLife.80643 (PMC9507127; doi:10.7554/eLife.80643)
Supplement: Figure 2—figure supplement 1—source data 1. [file elife-80643-fig2-figsupp1-data1.xlsx]

## Sheet: Sheet1
Figure Panel	Measurement	N (mice/embryos)	Sample Name	n (cells)	Subgroup	Replicate #1	Replicate #2	Replicate #3
Figure 2-figure supplement 1B	MBB stage cells	3	Control	596		60.98	64.86	92.48
		3	Plk4cKO	633		6.44	4.93	5.95
