# Supplementary material for: PLK4 drives centriole amplification and apical surface area expansion in multiciliated cells
Source: eLife. 2022 Aug 15;11:e80643. doi: 10.7554/eLife.80643 (PMC9507127; doi:10.7554/eLife.80643)
Supplement: Figure 2—source data 1. [file elife-80643-fig2-data1.xlsx]

## Sheet: Sheet1
Figure Panel	Measurement	N (mice/embryos)	Sample Name	n (cells)	Subgroup	Replicate #1	Replicate #2	Replicate #3		Figure Panel	Measurement	N (mice/embryos)	Sample Name	n (cells)	Subgroup	Replicate #1	Replicate #2	Replicate #3
2A	Centriole number per cell	3	Control	111		70	83	112		2C	Multiciliated cells	3	Control	215		62.71	63.33	62.55
		3	Plk4cKO	162		8	7	10				3	Plk4cKO	392		3.99	5.9	5.24
Figure 2A - Centriole number per cell
Control		Plk4cKO
n (cells)	Values (n)	n (cells)	Values(n)
111	62	162	2
	59		4
	59		1
	124		2
	64		2
	23		2
	46		3
	73		3
	23		2
	37		2
	65		2
	47		6
	46		2
	30		25
	123		1
	18		1
	61		1
	160		2
	149		2
	5		2
	66		2
	66		2
	174		2
	76		2
	117		2
	36		2
	72		2
	45		2
	45		2
	21		2
	89		3
	143		4
	116		4
	145		4
	22		4
	68		5
	50		7
	33		154
	23		38
	83		23
	34		23
	110		2
	148		2
	39		4
	38		7
			10
	34		10
	59		10
	61		10
	139		10
	113		10
	66		10
	105		10
	46		10
	108		10
	149		3
	20		4
	97		4
	48		4
	48		4
	60		7
	190		6
	45
	187		4
	10		42
	54		3
	46		15
	149		40
	97		4
	76		11
	102		6
	37		4
	29		6
	95		5
	124		2
	57		26
	158		2
	80		16
	70		5
	62		2
	121		2
	61		2
			3
	33		4
	67		4
	180		5
	98		7
	65		32
	49		2
	77		3
	37		3
	86		4
	203		4
	69		5
	123		1
	121		1
	290		1
	154		2
	119		2
	91		2
	119		3
	127		4
	59		4
	20		0
	134
	134		2
	230		2
	75		2
	15		2
	59		2
	47		1
	119		2
	91		2
			2
			1
			2
			0
			0
			2
			4
			2
			2
			3
			1
			4
			2
			0
			2
			2
			3
			3
			30
			44
			9
			30
			21
			1
			1
			2
			0
			0
			2
			0
			0
			2
			43
			2
			12
			22
			2
			1
			0
			2
			74
			20
			2
			5
			3
			4
			2
			2
			2
			0
			0
