# Supplementary material for: PLK4 drives centriole amplification and apical surface area expansion in multiciliated cells
Source: eLife. 2022 Aug 15;11:e80643. doi: 10.7554/eLife.80643 (PMC9507127; doi:10.7554/eLife.80643)
Supplement: Figure 4—figure supplement 1—source data 1. [file elife-80643-fig4-figsupp1-data1.xlsx]

## Sheet: Sheet1
Figure Panel	Measurement	N (mice/embryos)	Sample Name	n (cells)	Subgroup	Replicate #1	Replicate #2	Replicate #3
Figure 4-figure supplement 1D	SAS6 intensity on deuterosomes	3	Control	150		1	1	1
		3	Plk4cKO	150		0.08	0	0.17
