# Supplementary material for: PLK4 drives centriole amplification and apical surface area expansion in multiciliated cells
Source: eLife. 2022 Aug 15;11:e80643. doi: 10.7554/eLife.80643 (PMC9507127; doi:10.7554/eLife.80643)
Supplement: Figure 4—source data 1. [file elife-80643-fig4-data1.xlsx]

## Sheet: Sheet1
Figure Panel	Measurement	N (mice/embryos)	Sample Name	n (cells)	Subgroup	Replicate #1	Replicate #2	Replicate #3
4B	FOXJ1+ cells	3	Control		ALI 7	40.1	36.76	24.37
		3	Plk4cKO		ALI 7	50.46	40.68	41.36
		3	Control	7396	ALI 21	31.85	27.78	42.98
		3	Plk4cKO	8603	ALI 21	24.46	37.21	29.75
4C	DEUP1+ cells	3	Control		ALI 7	24.43	32.66	24.52
		3	Plk4cKO		ALI 7	25.66	28.83	25.68
		3	Control	6154	ALI 21	4.6	2.24	5.37
		3	Plk4cKO	6281	ALI 21	6.12	4.37	2.36
4D	PLK4+ cells	3	Control	539		49.4505	46.82	67.78
		3	Plk4cKO	453		12.1622	15.17	19.77
4F	STIL intensity on deuterosomes	3	Control	152		1	1	1
		3	Plk4cKO	187		0.08	0	0.17
4H	Multicliated cells ALI 7	3	Control	4717		45.57	39.52	36.75
		3	Plk4cKO	6038		8.72	2.6	0.47
4J	Multiciliated cells ALI 21	3	Control	7396		39.38	36.86	38.83
		3	Plk4cKO	8603		2.06	5.57	1.64
