# Supplementary material for: PLK4 drives centriole amplification and apical surface area expansion in multiciliated cells
Source: eLife. 2022 Aug 15;11:e80643. doi: 10.7554/eLife.80643 (PMC9507127; doi:10.7554/eLife.80643)
Supplement: Figure 5—figure supplement 1—source data 1. [file elife-80643-fig5-figsupp1-data1.xlsx]

## Sheet: Sheet1
Figure Panel	Measurement	N (mice/embryos)	Sample Name	n (cells)	Subgroup	Replicate #1	Replicate #2	Replicate #3	Replicate #4	Replicate #5	Replicate #6
Figure 5-figure supplement 1A	Centrin assemblies	3	Control	88	Stage II	57.9	60.53	51.61
				83	Stage III	47.8	50	66.67
				80	Stage IV	20	6.67	30
				75	Stage V	0	0	10
				96	Stage VI	8.3	0	13.33
Figure 5-figure supplement 1C	%Centrin-GFP recovery (FRAP)	1	Control	3	Pre-bleach	100	100	100
					0 min	0	0	0
					0.5 min	3.57914	3.8826	9.2428
					1 min	11.0805	8.26427	15.3491
					1.5 min	8.92326	11.0793	20.1902
					2 min	10.1075	14.3803	18.6742
					2.5 min	15.5276	16.1616	16.7177
					3 min	16.02	16.6341	23.4703
					3.5 min	18.9794	18.8319	22.0645
					4 min	17.7761	17.1696	19.2271
					4.5 min	19.4536	20.3338	24.5927
					5 min	16.9986	17.949	24.1442
					5.5 min	21.8326	18.1352	27.5279
					6 min	20.3403	17.5565	26.8695
					6.5 min	25.681	21.7522	24.2175
					7 min	25.2633	19.5485	26.9571
					7.5 min	24.6013	21.9478	23.0784
					8 min	19.8782	19.91	23.052
					8.5 min	20.9789	22.2991	25.5433
					9 min	19.0407	20.7941	29.3245
					9.5 min	18.4988	19.5259	30.0077
					10 min	15.6988	20.9308	31.816
		1	Plk4 KO	6	Pre-bleach	100	100	100	100	100	100
					0 min	0	0	0	0	0	0
					0.5 min	1.33946	2.6223	3.93913	8.1874	10.2334	10.6661
					1 min	2.61378	3.39318	5.93098	8.97012	10.8507	10.231
					1.5 min	2.91405	4.43197	5.15493	8.2431	12.5325	11.4494
					2 min	2.89893	5.33933	5.69147	9.09387	13.8553	11.0393
					2.5 min	3.19664	7.56516	5.99612	9.78553	14.118	8.98289
					3 min	1.9321	5.66101	6.08155	9.75886	13.6517	11.4768
					3.5 min	2.68227	7.47198	6.06959	10.2176	14.1466	13.375
					4 min	3.30752	8.11081	6.18749	11.6649	14.7859	10.7651
					4.5 min	3.33763	7.64579	5.63602	10.7847	16.1095	12.0271
					5 min	3.32322	7.73701	5.15025	9.76394	15.305	11.7346
					5.5 min	3.69925	9.42225	6.12955	12.3137	14.2835	14.7915
					6 min	3.98483	11.35	5.82195	10.1672	13.4389	13.6007
					6.5 min	3.66373	12.6781	6.43797	9.89255	12.1961	9.39155
					7 min	3.45485	9.05509	6.74197	10.9508	14.3702	12.2913
					7.5 min	4.45881	7.9445	5.8042	10.7104	16.3408	9.02968
					8 min	4.2274	7.14001	6.15969	12.5278	16.1247	13.6673
					8.5 min	2.98058	8.10951	6.0584	13.0199	16.3107	12.3766
					9 min	2.59969	10.5945	5.42828	11.8103	15.6285	14.1761
					9.5 min	2.94014	9.51697	5.61073	13.5334	14.0941	10.7815
					10 min	2.41587	11.1239	5.92198	11.2825	15.1396	12.9395
Figure 5-figure supplement 1F	Multiciliated cells	3	Control	4495		30.12	33.02	48.19
		3	Sas4cKO	4607		18.9	12.83	23.59
Figure 5-figure supplement 5G	Centrin assemblies	3	Control	4495		0.55	2.3	1.66
		3	Sas4cKO	4607		17.11	12.93	13.7
