# Supplementary material for: PLK4 drives centriole amplification and apical surface area expansion in multiciliated cells
Source: eLife. 2022 Aug 15;11:e80643. doi: 10.7554/eLife.80643 (PMC9507127; doi:10.7554/eLife.80643)
Supplement: Figure 6—figure supplement 1—source data 1. [file elife-80643-fig6-figsupp1-data1.xlsx]

## Sheet: Sheet1
Figure Panel	Measurement	N (mice/embryos)	Sample Name	n (cells)	Subgroup	Replicate #1	Replicate #2	Replicate #3	Replicate #4
Figure 6-figure supplement 1A	PLK4 intensity on deuterosomes	4	DMSO	240		1	1	1	1
		4	1 mM centrinone	240		1.09	1.36	1.01	0.69
		3	2.5 mM centrinone	150		1.27	1.85	1.18
		4	5 mM centrinone	200		1.19	1.76	1.93	2.18
		3	10 mM centrinone	150		2.51	3.13	2.23
Figure 6-figure supplement 1B	DEUP1+ cells	4	DMSO	3166		19.5	19.2	15.87	16.14
		4	1 mM centrinone	2699		15.5	14.6	14.72	20.07
		3	2.5 mM centrinone	2144		17.3	19.2	15.97
		3	5 mM centrinone	2100		13.1	14.3	15.13
		3	10 mM centrinone	2137		12.2	12.8	13.74
Figure 6-figure supplement 1C	Stage of centriole amplification	3	DMSO	476	A/G	23.68	19.17	25.19
					D	26.32	24.35	15.27
					MBB	50	56.48	59.54
		3	1 mM centrinone	364	A/G	30.33	20.83	40.41
					D	30.33	13.54	13.01
					MBB	39.34	65.63	46.58
		3	2.5 mM centrinone	385	A/G	38.52	45.67	36.76
					D	18.03	15.75	14.71
					MBB	43.44	38.58	48.53
		3	5 mM centrinone	296	A/G	57.45	68.92	67.19
					D	9.57	6.76	7.81
					MBB	32.98	24.32	25
		3	10 mM centrinone	258	A/G	85.87	74.63	81.82
					D	2.17	8.96	9.09
					MBB	11.96	16.42	9.09
Figure 6-figure supplement 1D	Centriole number per cell	3	DMSO	193		78.51	77.27	95.1
		3	1 mM centrinone	198		85.58	111.88	94.43
		3	2.5 mM centrinone	149		91.74	94.83	111.57
		3	5 mM centrinone	110		62.41	65.95	46.05
		3	10 mM centrinone	78		39.91	28.62	39.71
