# Supplementary material for: PLK4 drives centriole amplification and apical surface area expansion in multiciliated cells
Source: eLife. 2022 Aug 15;11:e80643. doi: 10.7554/eLife.80643 (PMC9507127; doi:10.7554/eLife.80643)
Supplement: Figure 6—figure supplement 2—source data 1. [file elife-80643-fig6-figsupp2-data1.xlsx]

## Sheet: Sheet1
Figure Panel	Measurement	N (mice/embryos)	Sample Name	n (cells)	Subgroup	Replicate #1	Replicate #2	Replicate #3		Figure 6-figure supplement 2G - Centriole number per cell
Figure 6-figure supplement 2A	MBB stage cells	3	DMSO	5543		25.49	49.09	38.59		DMSO	Verapamil	Verapamil + 10uM centrinone	10uM centrinone
		3	10 mM centrinone	4412		25.57	49.38	34.9		352	278	78	190
Figure 6-figure supplement 2B	Centriole number per cell	3	DMSO	159		176	172	214		210	359	59	181
		3	10 mM centrinone	158		156	176	283		234	279	109	198
Figure 6-figure supplement 2D	PLK4 intensity on deuterosomes	3	DMSO	150		1	1	1		279	224	169	187
		3	1 mM centrinone	150		0.619269	1.07	0.65		247	210	81	166
		3	2.5 mM centrinone	150		0.752943	0.35	1.1		195	128	57	226
		3	5 mM centrinone	150		1.0248	0.45	0.42		233	211	90	268
		3	10 mM centrinone	150		0.821192	0.2	0.81		217	222	72	122
Figure 6-figure supplement 2F	MBB stage cells	3	DMSO	4485		59.71	43.28	36.73		233	211	132	154
		3	10 mM centrinone	3585		41.48	35.32	47.09		229	225	92	177
		3	Verapamil	3225		31.97	20.29	20.16		132	206	105	192
		3	10 mM centrinone + Verapamil	4359		22.27	13.84	11.24		182	277	114	175
Figure 6-figure supplement 2G	Centriole number per cell	3	DMSO	157		227	228	298		197	229	107	140
		3	10 mM centrinone	152		239	270	254		175	109	116	165
		3	Verapamil	158		98	124	84		186	388	51	227
		3	10 mM centrinone + Verapamil	183		197	163	214		127	249	77	205
										158	286	182	272
										245	300	194	312
										268	262	86	200
										280	251	133	222
										262	279	85	151
										255	216	74	163
										208	218	62	150
										353	256	57	233
										209	258	98	259
										181	259	48	193
										250	207	173	263
										148	249	133	200
										165	261	154	205
										95	285	110	133
										273	241	55	86
										187	135	86	149
										251	201	65	266
										224	115	106	163
										122	241	93	194
										183	317	135	239
										169	327	126	410
										246	316	75	192
										218	256	252	166
										217	272	57	184
										244	184	78	228
										306	187	57	162
										233	223	137	212
										252	244	24	186
										207	191	43	155
										288	218	65	198
										272	221	71	129
										304	226	80	206
										351	228	65	198
										272	273	121	198
										258	192
										204	181
											243
											284
										209	196	80	195
										174	269	82	164
										164	231	103	209
										215	278	62	182
										242	336	101	191
										175	262	66	146
										182	193	66	152
										209	253	107	99
										254	280	106	176
										278	188	86	168
										161	291	127	195
										255	265	69	149
										214	246	113	185
										170	241	101	172
										333	208	86	150
										188	377	121	153
										224	208	140	168
										212	339	73	161
										193	410	146	207
										162	196	101	130
										533	228	46	155
										190	132	69	163
										165	233	105	121
										628	222	99	211
										197	345	125	164
										407	239	96	197
										248	392	87	184
										137	283	82	152
										329	222	106	151
										241	279	124	210
										186	260	101	140
										207	281	35	144
										193	277	3	104
										190	401	67	147
										232	266	18	145
										194	89	159	144
										197	378	61	167
										386	323	49	171
										202	256	20	174
										290	166	46	152
										187	243	36	187
										200	232	13	153
										163	182	28	151
										250	381	85	139
										197	413	91	147
										181	216	66	153
										203	324	74	126
										172	256	23	172
										232	331	70	159
										179	327	135	177
										182	202	110	195
										207	411	112
										165
										269
										162
										314	290	0	43
										359	280	0	177
										310	206	43	123
										306	175	40	164
										304	228	51	171
										322	292	98	240
										239	287	54	171
										280	222	96	259
										303	230	114	132
										238	178	111	251
										384	358	126	228
										224	298	91	113
										299	185	85	278
										326	216	54	180
										242	268	108	168
										281	265	54	179
										262	245	77	197
										354	187	78	160
										327	200	166	256
										343	283	112	205
										397	248	122	274
										244	211	110	227
										526	209	119	206
										360	259	131	221
										313	258	102	327
										291	214	94	189
										331	249	107	125
										267	241	66	208
										265	280	99	419
										275	305	89	301
										233	180	104	347
										226	272	116	237
										263	274	92	249
										244	352	38	171
										239	231	134	188
										295	218	112	199
										392	213	42	215
										235	176	6	186
										247	234	66	180
										282	277	113	265
										283	239	101	290
										375	280	0	227
										372	263	0	294
										240	245	0	194
										248	231	107	143
										295	353	125	190
										290	471	70	174
										328	402	56	332
										245	162	127	226
										290	355	85	187
											213	86	244
											212	83
												113
												35
												227
												144
												61
												125
												95
												35
												117
												68
												128
												108
												78
												98
												34
												28
												20
												126
												106
												80
												92
												86
												75
												114
												97
												92
												80
												78
												41
