# Supplementary material for: PLK4 drives centriole amplification and apical surface area expansion in multiciliated cells
Source: eLife. 2022 Aug 15;11:e80643. doi: 10.7554/eLife.80643 (PMC9507127; doi:10.7554/eLife.80643)
Supplement: Figure 6—figure supplement 4—source data 1. [file elife-80643-fig6-figsupp4-data1.xlsx]

## Sheet: Sheet1
Figure Panel	Measurement	N (mice/embryos)	Sample Name	n (cells)	Subgroup	Replicate #1	Replicate #2	Replicate #3		Figure 6-figure supplement 4F- Average number of deuterosomes per cell (ependymal cells)								Figure 6-figure supplement 4G - Average deuterosome size per cell (ependymal cells)
Figure 6-figure supplement 4A	PLK4+ deuterosomes	3	Plk4cWT	249		51.19	58.33	59.52		Control		Plk4cKO		Plk4cWT		Plk4cKD		Control		Plk4cKO		Plk4cWT		Plk4cKD
		3	Plk4cKD	252		96	91.23	95		n (cells)	Replicates (n)	n (cells)	Replicates (n)	n (cells)	Replicates (n)	n (cells)	Replicates (n)	n (cells)	Replicates (n)	n (cells)	Replicates (n)	n (cells)	Replicates (n)	n (cells)	Replicates (n)
Figure 6-figure supplement 4C	PLK4 intensity on deuterosomes	3	Plk4cWT	152		0.9	1.48	1		154	68		46	162	22		16	154	0.188	156	0.175	162	0.141	169	0.329
		3	Plk4cKD	150		3.65	3.95	2.68			67		43		37		5		0.193		0.196		0.16		0.537
Figure 6-figure supplement 4E	STIL+ Deuterosomes	3	Plk4 cWT			45.83	28	47.83			30		36		52		16		0.173		0.198		0.157		0.269
		3	Plk4 cKD			6.36	6.82	9.09			73		52		36		2		0.122		0.125		0.153		0.333
Figure 6-figure supplement 4F	Average number of deuterosomes per cell (ependymal cells)	3	Plk4cWT	178		14.14	17.51	20.41			60		47		36		5		0.259		0.146		0.153		0.154
		3	Plk4cKD	182		6.81	6.84	6.4			75		43		33		2		0.193		0.129		0.117		0.437
		3	Control	159		18.09	14.06	20.1			33		39		37		6		0.211		0.174		0.129		0.156
		3	Plk4cKO	161		15.53	15.63	18.61			74		42		43		12		0.165		0.16		0.124		0.255
Figure 6-figure supplement 4G	Average deuterosome size per cell (ependymal cells)	3	Plk4cWT	178		0.14	0.14	0.13			91		36		33		12		0.165		0.102		0.156		0.236
		3	Plk4cKD	182		0.21	0.2	0.21			73		45		62		6		0.215		0.182		0.15		0.364
		3	Control	159		0.13	0.16	0.12			78		43		29		4		0.216		0.192		0.118		0.536
		3	Plk4cKO	161		0.15	0.16	0.11			47		59		32		6		0.194		0.157		0.17		0.298
											88		30		32		12		0.165		0.16		0.174		0.396
											72		48		27		4		0.198		0.174		0.203		0.385
											90		61		30		9		0.18		0.176		0.146		0.157
											38		44		53		8		0.192		0.23		0.135		0.505
											105		74		38		5		0.158		0.196		0.167		0.537
											43		32		32		9		0.171		0.221		0.132		0.268
											44		26		43		16		0.194		0.199		0.121		0.276
											67		86		31		6		0.16		0.148		0.162		0.455
											67		94		49		5		0.158		0.185		0.141		0.558
											66		41		22		16		0.271		0.142		0.17		0.269
											68		59		20		7		0.151		0.142		0.153		0.503
											48		38		58		4		0.163		0.184		0.109		0.239
											45		29		27		11		0.186		0.206		0.066		0.362
											47		13		20		6		0.14		0.167		0.161		0.135
											51		15		31		7		0.235		0.164		0.136		0.226
											31		35		16		6		0.142		0.154		0.226		0.132
											58		35		22		4		0.144		0.183		0.157		0.619
											54		35		39		8		0.124		0.203		0.16		0.406
											69		59		34		8		0.229		0.181		0.16		0.484
											53		51		82		3		0.149		0.207		0.132		0.875
											34		69		48		15		0.132		0.12		0.129		0.244
											59		53		24		3		0.185		0.095		0.19		0.548
											41		40		28		4		0.15		0.229		0.148		0.307
											22		40		42		4		0.204		0.328		0.11		0.255
											84		73		39		8		0.166		0.102		0.143		0.414
											43		52		42		31		0.14		0.162		0.222		0.244
											33		57		34		19		0.151		0.345		0.178		0.289
											67		111		51		24		0.175		0.058		0.158		0.147
											29		38		18		16		0.177		0.309		0.16		0.186
											37		76		44		11		0.228		0.083		0.156		0.242
											84		48		25		11		0.181		0.101		0.206		0.197
											49		25		37		8		0.126		0.28		0.16		0.534
											54		40		12		7		0.175		0.274		0.142		0.559
											46		62		35		8		0.161		0.149		0.161		0.573
											59		58		29		12		0.169		0.111		0.095		0.665
											92		50		18		20		0.224		0.248		0.146		0.219
											110		58		21		10		0.166		0.192		0.14		0.317
											86		72		12		4		0.132		0.134		0.213		0.557
															22		4						0.127		0.5
											30		31		40		7		0.188		0.191		0.094		0.378
											34		26		31		9		0.154		0.185		0.152		0.134
											39		23		34		9		0.179		0.185		0.137		0.456
											24		39				5		0.209		0.167				0.454
											48		38		24		29		0.14		0.181		0.195		0.195
											42		32		25		3		0.174		0.225		0.18		1.124
											77		32		27		6		0.209		0.182		0.16		0.264
											54		25		35				0.142		0.203		0.155
											74		28		6		10		0.121		0.167		0.115		0.235
											65		32		31		26		0.181		0.172		0.162		0.26
											12		47		18		12		0.211		0.19		0.168		0.324
											41		34		10		10		0.168		0.193		0.202		0.437
											54		34		15		25		0.19		0.19		0.162		0.293
											49		23		24		13		0.155		0.241		0.198		0.298
											70		27		21		13		0.166		0.175		0.198		0.365
											58		27		22		21		0.185		0.174		0.202		0.263
											67		75		17		19		0.14		0.245		0.154		0.336
											44		50		22		33		0.19		0.212		0.167		0.234
											81		41		24		11		0.181		0.162		0.181		0.136
											88		50		8		2		0.204		0.206		0.271		0.562
											32		31		31		16		0.184		0.218		0.169		0.338
											80		25		12		6		0.147		0.238		0.149		0.382
											35		26		26		4		0.285		0.254		0.16		0.604
											56		29		28		5		0.17		0.208		0.177		0.371
											92		28		30		17		0.124		0.176		0.153		0.283
											79		27		28		11		0.183		0.135		0.161		0.24
											58		34		32		11		0.235		0.265		0.159		0.373
											46		36		55		11		0.231		0.194		0.134		0.271
											26		42		53		7		0.166		0.195		0.174		0.286
											76		24		29		15		0.139		0.253		0.174		0.301
											63		23		23		11		0.134		0.246		0.172		0.358
											60		35		85		7		0.192		0.248		0.202		0.416
											69		38		21		8		0.192		0.163		0.227		0.325
											35		65		22		3		0.242		0.2		0.186		0.479
											35		46		36		13		0.188		0.196		0.175		0.237
											48		27		22		6		0.207		0.278		0.154		0.194
											21		22		23		9		0.22		0.196		0.17		0.296
											110		46		14		13		0.222		0.188		0.183		0.263
											31		46		78		16		0.16		0.23		0.18		0.293
											30		43		16		11		0.132		0.226		0.173		0.343
											45		10		75		18		0.153		0.167		0.202		0.205
											46		20		14		12		0.176		0.174		0.21		0.345
											53		38		23		15		0.162		0.22		0.186		0.368
											26		28		27		3		0.15		0.273		0.153		0.881
											29		51		65		8		0.181		0.181		0.184		0.476
											30		24		22		10		0.179		0.282		0.199		0.348
											46		23		14		14		0.159		0.201		0.263		0.309
											29		31		33		7		0.172		0.237		0.239		0.348
											85		40		52		11		0.203		0.282		0.18		0.479
											69		32		26		6		0.103		0.229		0.161		0.5
													57		34		10				0.212		0.157		0.404
											52				17		5		0.154				0.16		0.7
											100		38		36		11		0.158		0.178		0.175		0.475
											43		47		4		7		0.177		0.2		0.141		0.381
											46		40		24		8		0.199		0.185		0.18		0.38
											33		39		90		14		0.216		0.236		0.152		0.384
											59		34				4		0.153		0.168				0.354
											54		56		40		6		0.194		0.155		0.204		0.593
											88		54		52		7		0.159		0.214		0.219		0.449
											79		52		41		5		0.141		0.188		0.307		0.575
											41		55		78		15		0.25		0.179		0.279		0.301
											55		44		57		8		0.187		0.181		0.231		0.406
											65		37		51		45		0.175		0.19		0.234		0.281
											57		59		45		13		0.156		0.175		0.189		0.279
											51		37		26				0.183		0.257		0.214
											47		40		58		6		0.161		0.221		0.192		0.489
											70		33		53		6		0.199		0.181		0.184		0.41
											47		47		61		8		0.162		0.168		0.218		0.416
											72		60		37		12		0.159		0.179		0.214		0.219
											69		33		44		14		0.185		0.155		0.185		0.219
											65		53		55		2		0.182		0.181		0.218		0.77
											46		46		54		2		0.192		0.148		0.295		0.302
											56		62		39		15		0.203		0.167		0.173		0.164
											57		64		31		15		0.224		0.193		0.227		0.242
											62		37		26		53		0.221		0.19		0.192		0.153
											58		55		51		11		0.149		0.201		0.194		0.21
											57		54		49		4		0.174		0.261		0.183		0.349
											66		32		42		5		0.202		0.145		0.196		0.412
											69		50		25		21		0.167		0.192		0.165		0.164
											43		88		33		23		0.186		0.167		0.205		0.139
											74		67		42		20		0.185		0.145		0.224		0.277
											69		74		31		13		0.148		0.205		0.197		0.224
											67		35		45		7		0.149		0.151		0.216		0.223
											63		26		46		6		0.217		0.162		0.273		0.396
											52		46		75		36		0.159		0.176		0.21		0.219
											55		46		52		13		0.074		0.142		0.227		0.314
											53		29		35		11		0.137		0.155		0.256		0.416
											49		58		73		6		0.214		0.148		0.213		0.243
											63		43		36		5		0.2		0.183		0.185		0.358
											30		36		51		5		0.171		0.178		0.176		0.321
											70		46		70		5		0.164		0.225		0.179		0.462
											33		49		55		8		0.206		0.199		0.18		0.455
											40		40		55		10		0.2		0.149		0.193		0.331
											109		40		30		14		0.154		0.198		0.235		0.193
											36		55		51		10		0.192		0.166		0.184		0.319
											46		59		55		9		0.183		0.193		0.221		0.155
											81		61		37		4		0.183		0.183		0.227		0.364
											56		35		29		18		0.174		0.215		0.293		0.19
											58		45		23		5		0.234		0.188		0.24		0.217
											34		87		53		7		0.211		0.192		0.25		0.265
											57		57		32		12		0.212		0.21		0.2		0.198
											55		46		71		4		0.22		0.215		0.189		0.25
											70		35		48		8		0.113		0.174		0.182		0.331
											43		50		68		7		0.152		0.192		0.222		0.312
											56		43		57		7		0.168		0.154		0.195		0.265
													54		57		17				0.146		0.175		0.332
													41		60		4				0.22		0.168		0.265
															59		9						0.223		0.354
															23		2						0.184		0.479
															50		8						0.206		0.271
															33		13						0.211		0.295
															30		6						0.209		0.437
															47		17						0.178		0.325
																	29								0.297
																	9								0.377
																	12								0.333
																	20								0.336
																	9								0.248
																	7								0.294
																	5								0.242
