# Supplementary material for: PLK4 drives centriole amplification and apical surface area expansion in multiciliated cells
Source: eLife. 2022 Aug 15;11:e80643. doi: 10.7554/eLife.80643 (PMC9507127; doi:10.7554/eLife.80643)
Supplement: Figure 6—source data 1. [file elife-80643-fig6-data1.xlsx]

## Sheet: Sheet1
Figure Panel	Measurement	N (mice/embryos)	Sample Name	n (cells)	Subgroup	Replicate #1	Replicate #2	Replicate #3	Replicate #4		Figure 6G - Average number of deuterosomes per cell (mTECs)				Figure 6H - Average deuterosome size per cell (mTECs)
6A	PLK4 intensity on deuterosomes	3	Plk4cWT	152		1	1	1			PLK4 cWT	PLK4 cKD	Control	Plk4cKO	PLK4 cWT	PLK4 cKD	Control	Plk4cKO
		4	Plk4cKD	150		3.07	2.6	4.99	3.39		22	16	68	46	0.141	0.329	0.188	0.175
6C	Multiciliated cells (mTECs)	3	Plk4 cWT			59.79	34.73	58.99			37	5	67	43	0.16	0.537	0.193	0.196
		3	Plk4 cKD			2.97	4.89	3.62			52	16	30	36	0.157	0.269	0.173	0.198
6E	Multiciliated cells (ependymal cells)	3	Plk4cWT	600		57.22	55.69	70.73			36	2	73	52	0.153	0.333	0.122	0.125
		4	Plk4cKD	715		6.63	5.16	1.01	1.45		36	5	60	47	0.153	0.154	0.259	0.146
6G	Average number of deuterosomes per cell (mTECs)	3	Plk4cWT	162		34.15	29.79	46.91			33	2	75	43	0.117	0.437	0.193	0.129
		3	Plk4cKD	169		9.19	11.73	11.16			37	6	33	39	0.129	0.156	0.211	0.174
		3	Control	154		60.04	51.82	57.89			43	12	74	42	0.124	0.255	0.165	0.16
		3	Plk4cKO	156		49.16	34.53	48.16			33	12	91	36	0.156	0.236	0.165	0.102
6H	Average deuterosome size per cell (mTECs)	3	Plk4cWT	162		0.15	0.18	0.21			62	6	73	45	0.15	0.364	0.215	0.182
		3	Plk4cKD	169		0.37	0.37	0.31			29	4	78	43	0.118	0.536	0.216	0.192
		3	Control	154		0.18	0.18	0.18			32	6	47	59	0.17	0.298	0.194	0.157
		3	Plk4cKO	156		0.18	0.21	0.18			32	12	88	30	0.174	0.396	0.165	0.16
											27	4	72	48	0.203	0.385	0.198	0.174
											30	9	90	61	0.146	0.157	0.18	0.176
											53	8	38	44	0.135	0.505	0.192	0.23
											38	5	105	74	0.167	0.537	0.158	0.196
											32	9	43	32	0.132	0.268	0.171	0.221
											43	16	44	26	0.121	0.276	0.194	0.199
											31	6	67	86	0.162	0.455	0.16	0.148
											49	5	67	94	0.141	0.558	0.158	0.185
											22	16	66	41	0.17	0.269	0.271	0.142
											20	7	68	59	0.153	0.503	0.151	0.142
											58	4	48	38	0.109	0.239	0.163	0.184
											27	11	45	29	0.066	0.362	0.186	0.206
											20	6	47	13	0.161	0.135	0.14	0.167
											31	7	51	15	0.136	0.226	0.235	0.164
											16	6	31	35	0.226	0.132	0.142	0.154
											22	4	58	35	0.157	0.619	0.144	0.183
											39	8	54	35	0.16	0.406	0.124	0.203
											34	8	69	59	0.16	0.484	0.229	0.181
											82	3	53	51	0.132	0.875	0.149	0.207
											48	15	34	69	0.129	0.244	0.132	0.12
											24	3	59	53	0.19	0.548	0.185	0.095
											28	4	41	40	0.148	0.307	0.15	0.229
											42	4	22	40	0.11	0.255	0.204	0.328
											39	8	84	73	0.143	0.414	0.166	0.102
											42	31	43	52	0.222	0.244	0.14	0.162
											34	19	33	57	0.178	0.289	0.151	0.345
											51	24	67	111	0.158	0.147	0.175	0.058
											18	16	29	38	0.16	0.186	0.177	0.309
											44	11	37	76	0.156	0.242	0.228	0.083
											25	11	84	48	0.206	0.197	0.181	0.101
											37	8	49	25	0.16	0.534	0.126	0.28
											12	7	54	40	0.142	0.559	0.175	0.274
											35	8	46	62	0.161	0.573	0.161	0.149
											29	12	59	58	0.095	0.665	0.169	0.111
											18	20	92	50	0.146	0.219	0.224	0.248
											21	10	110	58	0.14	0.317	0.166	0.192
											12	4	86	72	0.213	0.557	0.132	0.134
											22	4			0.127	0.5
											40	7			0.094	0.378
											31	9	30	31	0.152	0.134	0.188	0.191
											34	9	34	26	0.137	0.456	0.154	0.185
												5	39	23		0.454	0.179	0.185
												29	24	39		0.195	0.209	0.167
												3	48	38		1.124	0.14	0.181
												6	42	32		0.264	0.174	0.225
													77	32			0.209	0.182
											24	10	54	25	0.195	0.235	0.142	0.203
											25	26	74	28	0.18	0.26	0.121	0.167
											27	12	65	32	0.16	0.324	0.181	0.172
											35	10	12	47	0.155	0.437	0.211	0.19
											6	25	41	34	0.115	0.293	0.168	0.193
											31	13	54	34	0.162	0.298	0.19	0.19
											18	13	49	23	0.168	0.365	0.155	0.241
											10	21	70	27	0.202	0.263	0.166	0.175
											15	19	58	27	0.162	0.336	0.185	0.174
											24	33	67	75	0.198	0.234	0.14	0.245
											21	11	44	50	0.198	0.136	0.19	0.212
											22	2	81	41	0.202	0.562	0.181	0.162
											17	16	88	50	0.154	0.338	0.204	0.206
											22	6	32	31	0.167	0.382	0.184	0.218
											24	4	80	25	0.181	0.604	0.147	0.238
											8	5	35	26	0.271	0.371	0.285	0.254
											31	17	56	29	0.169	0.283	0.17	0.208
											12	11	92	28	0.149	0.24	0.124	0.176
											26	11	79	27	0.16	0.373	0.183	0.135
											28	11	58	34	0.177	0.271	0.235	0.265
											30	7	46	36	0.153	0.286	0.231	0.194
											28	15	26	42	0.161	0.301	0.166	0.195
											32	11	76	24	0.159	0.358	0.139	0.253
											55	7	63	23	0.134	0.416	0.134	0.246
											53	8	60	35	0.174	0.325	0.192	0.248
											29	3	69	38	0.174	0.479	0.192	0.163
											23	13	35	65	0.172	0.237	0.242	0.2
											85	6	35	46	0.202	0.194	0.188	0.196
											21	9	48	27	0.227	0.296	0.207	0.278
											22	13	21	22	0.186	0.263	0.22	0.196
											36	16	110	46	0.175	0.293	0.222	0.188
											22	11	31	46	0.154	0.343	0.16	0.23
											23	18	30	43	0.17	0.205	0.132	0.226
											14	12	45	10	0.183	0.345	0.153	0.167
											78	15	46	20	0.18	0.368	0.176	0.174
											16	3	53	38	0.173	0.881	0.162	0.22
											75	8	26	28	0.202	0.476	0.15	0.273
											14	10	29	51	0.21	0.348	0.181	0.181
											23	14	30	24	0.186	0.309	0.179	0.282
											27	7	46	23	0.153	0.348	0.159	0.201
											65	11	29	31	0.184	0.479	0.172	0.237
											22	6	85	40	0.199	0.5	0.203	0.282
											14	10	69	32	0.263	0.404	0.103	0.229
											33	5		57	0.239	0.7		0.212
											52	11			0.18	0.475
											26	7	52	38	0.161	0.381	0.154	0.178
											34	8	100	47	0.157	0.38	0.158	0.2
											17	14	43	40	0.16	0.384	0.177	0.185
											36	4	46	39	0.175	0.354	0.199	0.236
											4	6	33	34	0.141	0.593	0.216	0.168
											24	7	59	56	0.18	0.449	0.153	0.155
											90	5	54	54	0.152	0.575	0.194	0.214
												15	88	52		0.301	0.159	0.188
												8	79	55		0.406	0.141	0.179
												45	41	44		0.281	0.25	0.181
												13	55	37		0.279	0.187	0.19
													65	59			0.175	0.175
													57	37			0.156	0.257
											40	6	51	40	0.204	0.489	0.183	0.221
											52	6	47	33	0.219	0.41	0.161	0.181
											41	8	70	47	0.307	0.416	0.199	0.168
											78	12	47	60	0.279	0.219	0.162	0.179
											57	14	72	33	0.231	0.219	0.159	0.155
											51	2	69	53	0.234	0.77	0.185	0.181
											45	2	65	46	0.189	0.302	0.182	0.148
											26	15	46	62	0.214	0.164	0.192	0.167
											58	15	56	64	0.192	0.242	0.203	0.193
											53	53	57	37	0.184	0.153	0.224	0.19
											61	11	62	55	0.218	0.21	0.221	0.201
											37	4	58	54	0.214	0.349	0.149	0.261
											44	5	57	32	0.185	0.412	0.174	0.145
											55	21	66	50	0.218	0.164	0.202	0.192
											54	23	69	88	0.295	0.139	0.167	0.167
											39	20	43	67	0.173	0.277	0.186	0.145
											31	13	74	74	0.227	0.224	0.185	0.205
											26	7	69	35	0.192	0.223	0.148	0.151
											51	6	67	26	0.194	0.396	0.149	0.162
											49	36	63	46	0.183	0.219	0.217	0.176
											42	13	52	46	0.196	0.314	0.159	0.142
											25	11	55	29	0.165	0.416	0.074	0.155
											33	6	53	58	0.205	0.243	0.137	0.148
											42	5	49	43	0.224	0.358	0.214	0.183
											31	5	63	36	0.197	0.321	0.2	0.178
											45	5	30	46	0.216	0.462	0.171	0.225
											46	8	70	49	0.273	0.455	0.164	0.199
											75	10	33	40	0.21	0.331	0.206	0.149
											52	14	40	40	0.227	0.193	0.2	0.198
											35	10	109	55	0.256	0.319	0.154	0.166
											73	9	36	59	0.213	0.155	0.192	0.193
											36	4	46	61	0.185	0.364	0.183	0.183
											51	18	81	35	0.176	0.19	0.183	0.215
											70	5	56	45	0.179	0.217	0.174	0.188
											55	7	58	87	0.18	0.265	0.234	0.192
											55	12	34	57	0.193	0.198	0.211	0.21
											30	4	57	46	0.235	0.25	0.212	0.215
											51	8	55	35	0.184	0.331	0.22	0.174
											55	7	70	50	0.221	0.312	0.113	0.192
											37	7	43	43	0.227	0.265	0.152	0.154
											29	17	56	54	0.293	0.332	0.168	0.146
											23	4		41	0.24	0.265		0.22
											53	9			0.25	0.354
											32	2			0.2	0.479
											71	8			0.189	0.271
											48	13			0.182	0.295
											68	6			0.222	0.437
											57	17			0.195	0.325
											57	29			0.175	0.297
											60	9			0.168	0.377
											59	12			0.223	0.333
											23	20			0.184	0.336
											50	9			0.206	0.248
											33	7			0.211	0.294
											30	5			0.209	0.242
											47				0.178
