# Supplementary material for: PLK4 drives centriole amplification and apical surface area expansion in multiciliated cells
Source: eLife. 2022 Aug 15;11:e80643. doi: 10.7554/eLife.80643 (PMC9507127; doi:10.7554/eLife.80643)
Supplement: Figure 7—source data 1. [file elife-80643-fig7-data1.xlsx]

## Sheet: Sheet1
Figure Panel	Measurement	N (mice/embryos)	Sample Name	n (cells)	Subgroup	Replicate #1	Replicate #2	Replicate #3	Replicate #4		Figure 7B - Apical area										Figure 7C - Apical area
7B	Apical area	3	Control	131	Stage II	63.3557	68.3142	67.5814			Stage II		Stage III		Stage IV		Stage V		Stage VI		Control ALI 3	Plk4cKO ALI 3	Control ALI 7	Plk4cKO ALI 7	Plk4cKO MBB ALI 7	Sas4 control ALI 7	Sas4cKO ALI 7	Sas4cKO MBB ALI 7
		3	Control	75	Stage III	78.7055	82.498	76.4389			n (cells)	Replicates (n)	n (cells)	Replicates (n)	n (cells)	Replicates (n)	n (cells)	Replicates (n)	n (cells)	Replicates (n)	80.218	91.076	94.031	36.531	109.985	221.552	69.771	146.558
		3	Control	87	Stage IV	82.9668	91.8356	105.138			129	58.187	75	76.14	87	54.297	92	80.218	76	115.687	58.187	67.569	103.705	54.317	103.675	138.574	51.72	127.544
		3	Control	91	Stage V	104.912	109.929	108.488				55.358		67.257		53.985		110.611		120.326	55.358	101.124	170.67	62.639	108.256	351.797	51.741	100.458
		3	Control	76	Stage VI	122.685	146.77	138.726				39.901		87.249		87.041		110.382		151.573	39.901	85.418	124.778	106.742	191.422	174.306	76.489	113.564
7C	Apical area	3	Control	460	ALI 3	89.6781	87.7976	98.4513				40.878		56.086		70.939		73.956		132.163	54.297	50.593	96.777	64.386	119.251	160.896	77.071	158.624
		3	Plk4cKO	337	ALI 3	87.3952	75.6903	70.3682				58.998		107.678		68.547		110.923		97.006	53.985	113.918	102.644	47.744	113.087	190.339	74.243	244.832
		4	Control	296	ALI 7	128.544	200.148	157.36	150.799			85.231		60.538		49.387		46.974		123.426	40.878	84.752	186.731	50.51	127.788	144.613	51.242	146.995
		4	Plk4cKO	340	ALI 7	68.4864	106.591	96.5376	71.2247			71.771		99.793		107.407		96.465		103.205	110.611	86.895	108.385	60.496	318.981	123.353	65.612	95.486
		3	Plk4cKO MBB	132	ALI 7	147.286	164.552	131.026				63.949		76.223		74.809		150.824		146.892	87.041	65.322	95.258	71.376	121.104	154.149	61.723	295.591
		3	Control	150	ALI 7	176.636	136.091	134.262				36.406		54.567		91.597		78.678		97.214	110.382	70.647	82.922	86.084	157.273	184.696	45.585	133.909
		3	Sas4cKO	150	ALI 7	70.9383	71.1482	84.336				38.736		46.391		88.809		91.118		98.379	70.939	93.302	94.197	50.906	183.634	137.137	72.6	133.348
		3	Sas4cKO MBB	150	ALI 7	163.931	148.121	159.257				60.142		70.274		72.957		92.304		99.024	58.998	68.921	99.107	93.906	161.042	130.37	109.222	117.142
												74.746		59.539		63.617		122.136		114.418	73.956	75.682	83.297	86.625	134.805	141.614	60.891	186.458
												88.414		95.425		81.424		71.21		108.24	85.231	76.764	130.52	53.568	124.123	142.405	80.357	188.83
												78.033		123.696		73.332		72.687		140.006	110.923	80.799	88.893	89.787	174.41	131.328	67.546	146.412
												45.102		78.657		86.23		119.328		143.085	46.974	141.877	79.198	52.82	106.008	180.386	45.648	147.203
												68.568		85.522		63.762		122.032		156.795	115.687	61.161	126.526	59.705	147.132	97.22	85.868	158.728
												83.234		55.878		62.992		90.474		110.133	120.326	102.643	82.485	79.177	155.94	173.889	48.518	126.628
												74.289		88.997		88.04		95.009		105.286	76.14	94.696	111.922	52.57	146.008	211.703	53.654	91.201
												55.982		86.396		66.279		94.01		151.76	151.573	67.194	99.461	47.744	146.841	208.538	113.381	143.354
												71.231		141.067		111.88		142.877		120.181	67.257	204.266	81.403	62.41	218.324	164.498	56.649	142.293
												61.391		61.64		111.776		98.961		107.387	71.771	91.742	271.088	54.941	137.741	425.426	70.77	333.411
												52.008		52.508		71.085		120.347		107.387	68.547	148.222	104.037	47.161	121.541	97.47	65.799	157.5
												58.332				128.585		73.186		126.234	49.387	89.745	70.232	43.021	153.004	99.24	76.655	144.415
												73.394		81.77		104.245		112.463		132.517	96.465	52.549	101.583	62.597	128.975	290.579	102.775	89.349
												55.462		58.012		102.498		116.353		178.076	87.249	58.353	145.831	65.031	167.247	130.453	72.558	272.666
												24.61		57.741		132.808		177.639		110.008	63.949	85.792	106.18	59.019	137.158	136.075	83.539	249.554
												88.227		61.905		99.045		135.45		151.802	150.824	71.396	112.816	58.208	136.388	125.935	50.992	188.081
												54.692		66.965		139.694		133.183		125.86	78.678	134.451	133.266	84.482	128.871	145.071	54.278	304.786
												33.909		99.49		69.837		116.665		130.77	91.118	47.91	110.382	43.312	128.121	151.234	81.064	182.027
												59.206		122.083		64.137		104.724		115.666	36.406	141.94	246.561	56.481	154.253	208.788	53.945	129.395
												56.002		67.777		87.998		105.369		139.632	92.304	123.342	298.902	73.644	150.776	183.134	138.108	114.895
												71.792		70.318		87.852		98.67		105.473	56.086	100.812	122.178	90.39		162.312	77.944	174.08
												58.374		66.924		102.269		125.486		86.209	107.407	70.481	110.32	57.916	230.089	186.841	59.373	166.029
												76.764		76.96		57.417		80.176		141.754	38.736	121.532	140.048	90.848	129.724	216.596	82.977	161.515
												67.049		109.901		64.241		119.557		93.407	60.142	69.066	310.469	70.856	308.444	152.629	129.831	131.517
												22.946		62.78		101.187		105.91		125.964	74.746	78.407	115.188	84.108	176.409	124.227	50.493	173.81
												58.998		96.971		63.7		110.549		122.303	74.809	59.726	113.045	101.021	196.898	365.373	72.101	149.137
												90.037		109.11		78.449		108.968		126.796	91.597	121.178	130.395	96.673	135.034	437.628	101.86	304.724
												67.673		87.455		51.551		95.425			88.414	51.113	131.019	78.844	182.031	126.893	72.953	103.246
												68.984		75.419				116.457		117.502	107.678	43.999	115.708	65.301	109.86	96.575	80.793	109.591
												53.111		100.989		82.207		89.496		149.589	78.033	110.839	109.738	72.915	280.501	89.391	87.095	121.469
												114.834		59.802		54.118		125.382		129.558	45.102	102.851	113.316	91.014	184.488	120.604	52.802	158.832
												81.029		110.047		95.471		85.169		124.123	68.568	83.4	137.51	77.846	135.784	148.923	67.796	151.355
												69.795		97.533		76.502		88.31		226.841	88.809	59.559	182.154	68.214	94.784	151.338	53.298	163.75
												51.343		74.982		108.985				173.015	83.234	68.38	184.213	52.82	108.777	189.485	65.946	216.676
												84.316		82.52		99.553		88.308		139.698	74.289	84.482	125.548	47.619	97.116	171.203	51.696	130.538
												100.21				86.08		93.077		113.837	60.538	74.538	79.323	69.545	99.886	148.257	41.502	152.249
												71.73		108.923		95.638		84.664			132.163	103.808	171.399	74.455	170.537	210.183	56.064	153.601
												32.599		50.578		76.086		121.791		98.595	55.982	74.226	91.826	114.293	156.627	176.596	96.568	163.209
												50.531		134.951		75.107		124.227		106.841	71.231	91.367		70.19	67.09		46.745
												67.923		93.577		98.158		166.122		230.797	97.006	77.929	108.756		114.628	118.918		275.108
												80.072		65.112		122.124		83.811		144.862	123.426	89.516	116.773	47.017	389.132	109.048	82.561	158.814
												42.147		57.449		100.261		121.541		239.272	61.391	89.079	112.338	45.81	119.355	135.971	36.023	108.007
												72.562		105.237		71.65		119.667		124.123	52.008	114.189	103.488	52.452	233.754	147.944	71.088	84.789
														54.18		95.555		165.602		163.707	122.136	83.879	151.734	50.474	131.161	142.572	62.738	110.88
												87.6		55.326		92.41		106.736		241.729	71.21	81.049	155.107	143.384	97.137	100.011	68.923	152.9
												73.899		75.523		118.543		105.175		91.39	72.687	97.942	146.903	67.403		297.159	67.465	121.729
												53.202		89.641		104.592		125.997		98.72	58.332	39.693	120.021	66.382	110.255	100.927	38.022	115.94
												72.483		89.329				94.763		96.096	103.205	69.441	147.84	48.954	134.514	106.424	70.464	112.067
												109.652		92.181		142.218		65.445		117.647	146.892	45.497	117.189	209.1	140.115	177.137	59.24	111.9
												53.951		61.968		79.126		86.414		72.067	99.793	84.981	545.259	71.047	173.514	115.44	53.785	84.352
												75.398		83.769		101.552		115.461		119.313	72.957	89.828	542.074	81.187	124.519	110.006	50.849	163.082
												106.008		68.735		87.538				152.213	73.394	55.586	224.446	62.655	119.646	101.323	55.555	123.561
												82.312		68.714		153.358		150.734		120.708	97.214	79.635	126.955	90.578	86.434	133.743	77.335	128.725
												74.503		73.649		97.45		101.406		306.279	63.617	89.246	153.421	334.66	118.772	143.301	100.906	95.201
												59.386		74.191		79.709		171.286		156.96	81.424	77.554	143.801	211.182	116.731	163.707	87.08	118.48
												73.629		108.111		44.977		89.162		124.498	55.462	52.341	133.951	136.159	114.628	127.601	202.499	160.729
												70.922		57.887		89.912		109.839		128.475	98.379	75.578	107.778	49.37	139.532	126.539	69.527	122.374
												60.698		61.551		81.125		120.125		116.044	119.328	87.353	248.101	62.01	104.383	138.095	56.033	114.691
												52.369		67.736		108.048		167.642		136.367	24.61	114.522	243.561	60.323	144.967	128.746	85.747	141.927
												42.686		103.009		104.737		102.301		93.348	122.032	64.24	369.621	79.063	126.601	428.528	73.358	323.374
												99.178		72.858		131.599		98.761		127.767	99.024	125.714	152.671	115.628	103.717	137.012	63.134	186.279
												43.873		77.71		100.615		113.316		111.671	76.223	66.071	160.896	154.17	145.112	123.145	88.225	118.751
												82.291		79.188		91.494		104.842		126.122	114.418	63.949	150.63	78.23	164.227	138.866	98.865	302.989
												59.948		58.47		86.455		99.469		165.852	73.332	85.834	147.632	84.186	122.874	118.397	91.265	226.466
												62.697		48.204		208.163		89.204		129.6	54.567	70.897	148.715	223.926	154.295	103.301	50.953	83.915
												54.805		55.409		84.852		162.666		138.678	46.391	59.144	298.804	340.719	142.135	121.958	76.273	165.373
												88.204				119.043		68.943		82.041	88.227	54.484	307.487	74.878	140.406	99.615	50.869	166.83
												76.502				211.682		94.451			54.692	51.967	110.693	46.351	114.191	111.88	63.613	187.57
												73.337				94.909		95.721			108.24	111.901	139.074	40.729	154.92	115.877	68.943	130.724
												89.828				101.801		85.872			33.909	66.05	290.662	138.616	106.028	117.481	59.261	126.684
												43.831				70.297		84.477			59.206	117.102	146.82	96.533	135.68	114.274	45.685	165.977
												99.386				104.8		114.94			140.006	68.214	131.494	130.745	91.578	133.972	72.608	323.228
												68.111				95.638		108.985			143.085	104.017	342.198	148.132	142.926	128.6	66.507	123.145
												63.072				115.607		114.128			156.795	76.14	557.087	63.488	112.379	145.446	66.424	155.565
												54.451				98.033		109.464			110.133	55.191	165.289	58.491	97.304	117.856	50.745	97.616
												93.327				87.559		95.471			105.286	78.803	145.092	47.496	91.703	142.593	45.789	163.894
												46.538				93.327		113.566			70.274	71.314	153.92	89.454	110.859	130.224	111.63	148.028
												59.906				88.517		90.162			151.76	55.545	162.041	53.41	133.264	153.191	89.204	168.246
												50.307						97.241			56.002	42.751	124.706	80.167	116.044	138.199	85.31	146.029
												63.217						95.888			71.792	51.155	172.848	186.737	296.138	130.911	70.547	134.972
												57.533						103.28			120.181	86.729	323.458	161.666	130.537	129.829	61.801	84.144
												48.6						101.302			107.387	68.672	306.008	49.183	160.354	80.313	45.685	145.508
												64.113									107.387	81.008	204.54	65.716	111.734	116.981	29.235	130.87
												41.978									126.234	93.157	192.9	54.867	144.113	118.605	88.433	126.185
												67.153									86.23	87.561	149.381	42.291	129.266	113.67	101.26	172.348
																					63.762	78.72	136.658	67.923	118.813	132.057	57.72	99.157
												26.32									62.992	70.586	160.23	225.862	146.861	144.488	53.306	124.019
												77.293									88.04	287.897	191.38	195.503		135.784	77.96	130.183
												46.767									90.474	61.786	214.951	60.635		156.877	60.26	149.173
												35.607									58.374	57.937		115.69			96.7	141.656
												63.217									132.517	95.82	162.208	131.89
												59.657									178.076	66.446	132.994	59.469		140.74	131.786	212.848
												23.446									95.009	254.029	122.124	104.821		132.515	52.369	217.262
												43.998									76.764	95.279	112.067	126.226		105.154	107.611	126.039
												53.222									59.539	67.777	125.851	310.985		139.22	66.195	122.187
												84.456									110.008	118.246	133.618	101.76		142.947	73.108	129.891
												65.695									151.802	57.979	138.054	71.13		136.638	50.745	105.591
												122.437									94.01	121.991	168.538	173.827		114.108	68.069	134.93
												73.795									142.877	75.599	139.365	76.273		121.062	146.445	199.792
												46.247									125.86	79.822	146.403	86.143		105.591	101.343	189.319
												89.828									130.77	127.129	97.387	124.227		130.87	80.896	177.512
												47.101									98.961	63.138	113.358	42.249		145.466	86.559	113.129
												65.591									115.666	168.944	126.081	45.601		128.829	53.951	283.416
												62.426									139.632	88.976	112.567			237.023	88.725	130.183
												57.366									66.279	215.439	191.63	64.238		134.326	111.047	152.484
												50.974									111.88	152.467	114.545	103.155		116.273	53.681	161.437
												58.282									120.347	134.244	169.704	105.82		166.809	81.833	146.528
												47.6									105.473	71.002	113.441	45.247		113.025	62.051	239.855
												47.996									73.186	46.163	127.413	62.905		137.47	55.763	281.812
												97.991									112.463	53.402	119.75	82.582		99.365	59.886	120.583
												36.315									116.353	227.588	140.76	125.477		113.92	70.797	259.72
												31.817									111.776	267.905	114.253	110.214		137.47	51.765	255.451
												67.382									71.085	77.222	151.151	144.779		142.864	83.832	99.698
												67.673									95.425	151.365	121.562	76.398		152.775	84.956	107.132
												176.367									67.049	43.541	131.036	86.122		113.92	69.048	129.225
												153.296									22.946	50.885	159.522	81.187		115.69	67.632	120.167
												126.497									177.639	205.703	113.191	94.264		104.883	81.895	140.386
												73.545									135.45	87.956	121.208	37.064		172.494	57.991	93.327
												40.875									123.696	222.471	155.607	182.572		118.064	63.842	114.482
												76.689									128.585	31.642	122.707	157.46		144.821	78.272	146.403
																					58.998	37.28	123.02	164.54		132.015	74.253	165.019
																					90.037	61.058	138.637	184.28		123.623	108.152	157.356
																					67.673	16.164	171.37	191.068		132.057	73.483	108.735
																					68.984	71.085	163.873	288.892		123.54	67.278	103.634
																					104.245	72.916	173.535	64.383		136.533	62.28	117.398
																					133.183	62.015	166.955	54.326		120.646	274.899	258.387
																					116.665	73.748	381.698	233.421		99.802	95.513	253.077
																					53.111	53.985	322.812	43.124		122.624	82.52	109.693
																					78.657	85.751	118.126	54.867		133.951	93.514	318.314
																					86.209	66.82	249.975	53.493		110.922	101.239	83.269
																					141.754	97.672	271.38	61.239		134.659	88.871	113.441
																					114.834	107.345	145.779	102.114		200.5	215.139	129.037
																					104.724	39.027	110.963	74.815		157.106	116.69	172.827
																					81.029	76.91	106.945	62.239		176.075	51.64	109.547
																					102.498	45.996	245.498	82.686		124.165	72.879	112.192
																					85.522	58.873	253.931	87.58		107.194	69.339	281.875
																					93.407	77.971	275.295	77.106		143.613	69.985	151.755
																					132.808	67.798	295.972	40.083		133.847	77.647	124.082
																					55.878	34.658	82.374	50.516		156.544	73.233	122.895
																					99.045	95.05	261.823	52.015		194.816	52.077	93.618
																					139.694	59.04	111.942	66.257		84.56	54.076	165.935
																					69.795	71.979	243.02	65.362
																					51.343	65.551	292.682	40.354
																					84.316	114.481	260.511	65.424
																					69.837	59.248	245.852	49.703
																					100.21	81.07	245.831	69.027
																					71.73	85.689	124.331	48.058
																					64.137	101.541	74.607	60.406
																					87.998	57.688	251.745	63.592
																					105.369	94.884	244.061	58.345
																					98.67	63.096	114.253	116.794
																					125.486	85.606	102.114	77.481
																					80.176	57.896	113.816	58.511
																					87.852	67.673	150.526	47.246
																					119.557	86.771	157.21	46.247
																					102.269	93.199	118.751	47.5
																					105.91	92.887	141.989	127.559
																					57.417		108.881	57.512
																					64.241	110.006	313.837	41.895
																					110.549	80.542	144.8	114.857
																					108.968	134.451	143.842	282.229
																					95.425	47.309	145.425	82.541
																					101.187	79.896	121.812	261.615
																					32.599	139.407	154.045	141.573
																					50.531	94.868	133.597	49.766
																					88.997	141.739	129.246	68.61
																					86.396	101.76	123.269	55.763
																					67.923	61.239	126.601	72.108
																					141.067	76.606	116.19	43.165
																					125.964	64.966	117.752	44.998
																					116.457	78.23	113.066	41.728
																					63.7	51.765	103.238	40.916
																					122.303	56.387	156.898	46.164
																					80.072	89.35	132.952	68.548
																					89.496	72.4	157.064	45.122
																					125.382	92.64	173.348	45.456
																					78.449	85.477	121.458	25.987
																					85.169	99.011	138.532	28.152
																					42.147	75.294	119.043	42.999
																					61.64	65.778	142.385	43.602
																					88.31	54.638	108.444	153.15
																					52.508	54.159	132.411	95.617
																					51.551	72.462	105.091	55.409
																					72.562	85.352		47.475
																					126.796	109.256	140.442	63.113
																						88.288	120.991	69.152
																					88.308	51.348	124.341	53.472
																					87.6	48.704	117.122	68.527
																					82.207	82.707	126.4	54.368
																					81.77	37.002	124.84	60.302
																					54.118	49.578	109.009	62.155
																					95.471	65.091	270.4	42.311
																					93.077	103.738	126.255	186.653
																					84.664	70.13	490.831	291.62
																					117.502	81.937	131.643	39.709
																					58.012	62.842	147.12	116.835
																					57.741	73.524	508.347	65.883
																					76.502	75.065	300.502	217.991
																					73.899	86.83	279.22	50.224
																					53.202	42.54	144.062	205.519
																					61.905	44.415	120.596	318.189
																					121.791	77.606	106.45	250.495
																					72.483	91.182	104.453	63.301
																					109.652	52.535	119.265	60.385
																					53.951	79.917	237.614	81.916
																					75.398	84.706	277.931	53.701
																					106.008	68.881	293.325	218.22
																					82.312	66.32	123.176	114.795
																					74.503	53.556	81.923	349.132
																					66.965	88.954	82.401	83.894
																					124.227	99.865	97.421	170.953
																					149.589	106.382	110.195	212.223
																					108.985	61.073	83.005	156.606
																					99.49	51.619	300.336	93.472
																					99.553	64.009	277.868	86.934
																					122.083	57.429	115.583	88.392
																					59.386	91.661	115.687	71.234
																					86.08	111.734	88.58	174.285
																					67.777	57.845	163.68	68.61
																					73.629	77.585	128.897	44.456
																					70.922	65.591	126.4	98.761
																					60.698	59.657	109.404
																					52.369	74.545	121.511	63.196
																					42.686	60.011	93.51	60.406
																					70.318	83.478	132.392	91.161
																					95.638	66.132	96.922	53.327
																					99.178	83.165	131.788	56.492
																					76.086	59.573	72.915	44.248
																					43.873	40.271	91.555	69.651
																					66.924		116.997	50.953
																					82.291	85.268	122.198	76.606
																					59.948	84.311	142.377	71.192
																					76.96	55.117	124.486	38.438
																					62.697	95.95	146.101	99.802
																					54.805	75.419	94.509	80.042
																					88.204	79.23	152.051	147.07
																					75.107	66.341	80.633	54.472
																					98.158	84.685	335.847	52.91
																					166.122	114.253	275.975	53.41
																					109.901	132.161	104.078	142.01
																					62.78	74.461	87.29	83.207
																					96.971	103.925	138.05	50.078
																					76.502	81.312	114.251	167.809
																					73.337	58.553	74.475	70.651
																					89.828	90.099	117.913	78.272
																					129.558	59.386	89.703	140.511
																					43.831	42.728	110.59	52.473
																					99.386	109.547	91.222	145.758
																					122.124	78.168	120.575	88.912
																					100.261	88.204	161.662	69.568
																					68.111	67.298	122.905	64.571
																					109.11	90.12	118.786	38.022
																					87.455	66.57	96.818	46.622
																					63.072	45.643	197.63	32.442
																					75.419	91.328	128.439	20.094
																					54.451	100.781	142.543	40.333
																					93.327	57.262	103.683	71.734
																					46.538	57.803	232.205	72.754
																					71.65	145.841	148.701	72.4
																					95.555	76.148	125.88	49.995
																					59.906	72.067	140.775	51.682
																					100.989	93.577	142.086	61.281
																					92.41	72.858	122.697	50.682
																					50.307	51.577	122.801	36.231
																					83.811	78.022	141.15	26.507
																					63.217	65.05	127.42	60.823
																					57.533	85.248	103.787	195.878
																					124.123	62.468	129.978	104.654
																					48.6	48.641	101.374	79.875
																					59.802	88.746	95.341	66.736
																					110.047	79.501	123.197	57.075
																					97.533	66.757	144.769	60.781
																					226.841	66.549	684.134*	58.47
																					64.113	78.001	168.943	72.046
																					74.982	78.272	195.363	71.775
																					121.541	62.176	105.431	59.594
																					118.543	32.317	109.487	42.853
																					173.015	63.03	96.61	80.792
																					119.667	39.459	107.199	49.287
																					165.602	49.787	126.421	64.342
																					106.736	54.264	131.331	60.011
																					139.698	69.714	137.488	62.259
																					105.175	51.869	111.859	64.321
																					125.997	72.213	125.402	58.449
																					104.592	48.246		63.301
																					113.837	57.304		36.814
																					41.978	31.983		48.537
																					67.153	44.727		58.157
																					82.52	58.907		34.045
																					94.763	83.561		35.856
																					65.445	88.225		61.447
																					86.414	88.413		75.565
																					115.461	89.516		76.481
																						83.02		62.718
																					26.32	57.241		151.255
																					77.293	59.448		87.788
																					46.767	77.668		97.325
																					35.607	62.655		65.32
																					63.217	33.649		64.321
																					59.657	60.76		48.85
																					23.446	68.152		54.534
																					43.998	69.651		55.346
																					53.222	55.825		97.2
																					84.456	41.645		59.282
																					65.695	82.853		118.168
																					122.437	44.227		81.708
																					73.795	61.197		84.998
																					46.247	55.201		49.808
																					89.828	80.916		58.99
																					47.101	62.343		82.332
																					65.591	38.688		53.472
																					62.426	58.761		45.768
																					57.366	52.369		88.225
																					50.974	62.718		63.176
																					58.282	81.354		61.614
																					47.6			89.662
																					47.996			106.882
																					97.991			74.461
																					36.315			82.062
																					31.817			56.533
																					67.382			107.424
																					67.673			57.158
																					176.367			67.049
																					153.296			85.372
																					126.497			105.112
																					73.545			159.334
																					40.875			27.194
																					76.689			51.182
																					108.923
																					50.578
																					134.951
																					93.577
																					65.112
																					57.449
																					105.237
																					54.18
																					55.326
																					75.523
																					89.641
																					89.329
																					92.181
																					61.968
																					83.769
																					68.735
																					68.714
																					73.649
																					74.191
																					108.111
																					57.887
																					61.551
																					67.736
																					103.009
																					72.858
																					77.71
																					79.188
																					58.47
																					48.204
																					55.409
																					142.218
																					79.126
																					101.552
																					87.538
																					153.358
																					97.45
																					79.709
																					44.977
																					89.912
																					81.125
																					108.048
																					104.737
																					131.599
																					100.615
																					91.494
																					86.455
																					208.163
																					84.852
																					119.043
																					211.682
																					94.909
																					101.801
																					70.297
																					104.8
																					95.638
																					115.607
																					98.033
																					87.559
																					93.327
																					88.517
																					150.734
																					101.406
																					171.286
																					89.162
																					109.839
																					120.125
																					167.642
																					102.301
																					98.761
																					113.316
																					104.842
																					99.469
																					89.204
																					162.666
																					68.943
																					94.451
																					95.721
																					85.872
																					84.477
																					114.94
																					108.985
																					114.128
																					109.464
																					95.471
																					113.566
																					90.162
																					97.241
																					95.888
																					103.28
																					101.302
																					98.595
																					106.841
																					230.797
																					144.862
																					239.272
																					124.123
																					163.707
																					241.729
																					91.39
																					98.72
																					96.096
																					117.647
																					72.067
																					119.313
																					152.213
																					120.708
																					306.279
																					156.96
																					124.498
																					128.475
																					116.044
																					136.367
																					93.348
																					127.767
																					111.671
																					126.122
																					165.852
																					129.6
																					138.678
																					82.041
