# Supplementary figures and images for: PLK4 drives centriole amplification and apical surface area expansion in multiciliated cells
Source: eLife journal article supplement (doi:10.7554/elife.80643), 2022-08-15

## FIGURE 6 - FIGURE SUPPLEMENT 2

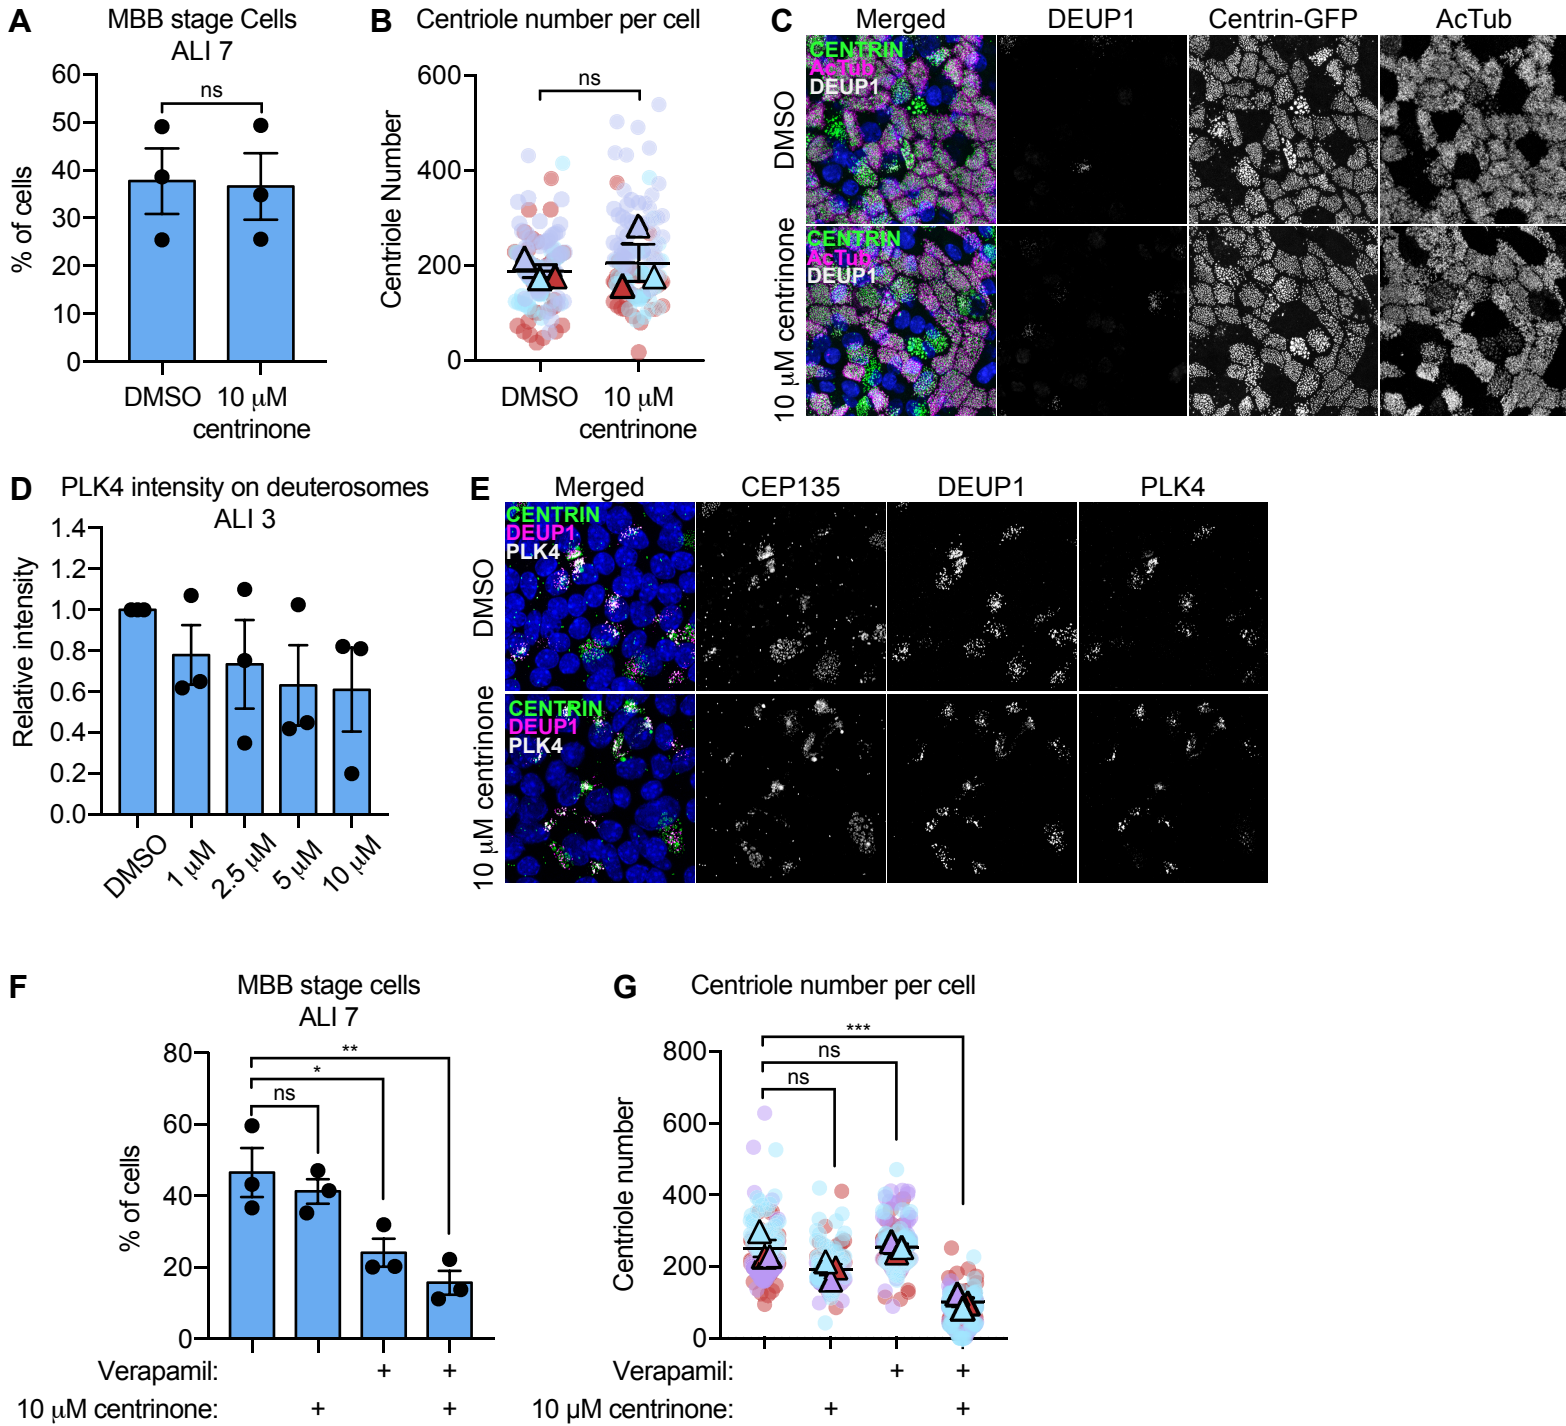

Supplement: supp [file elife-80643-supp-v1.zip]

FIGURE 6 - FIGURE SUPPLEMENT 4

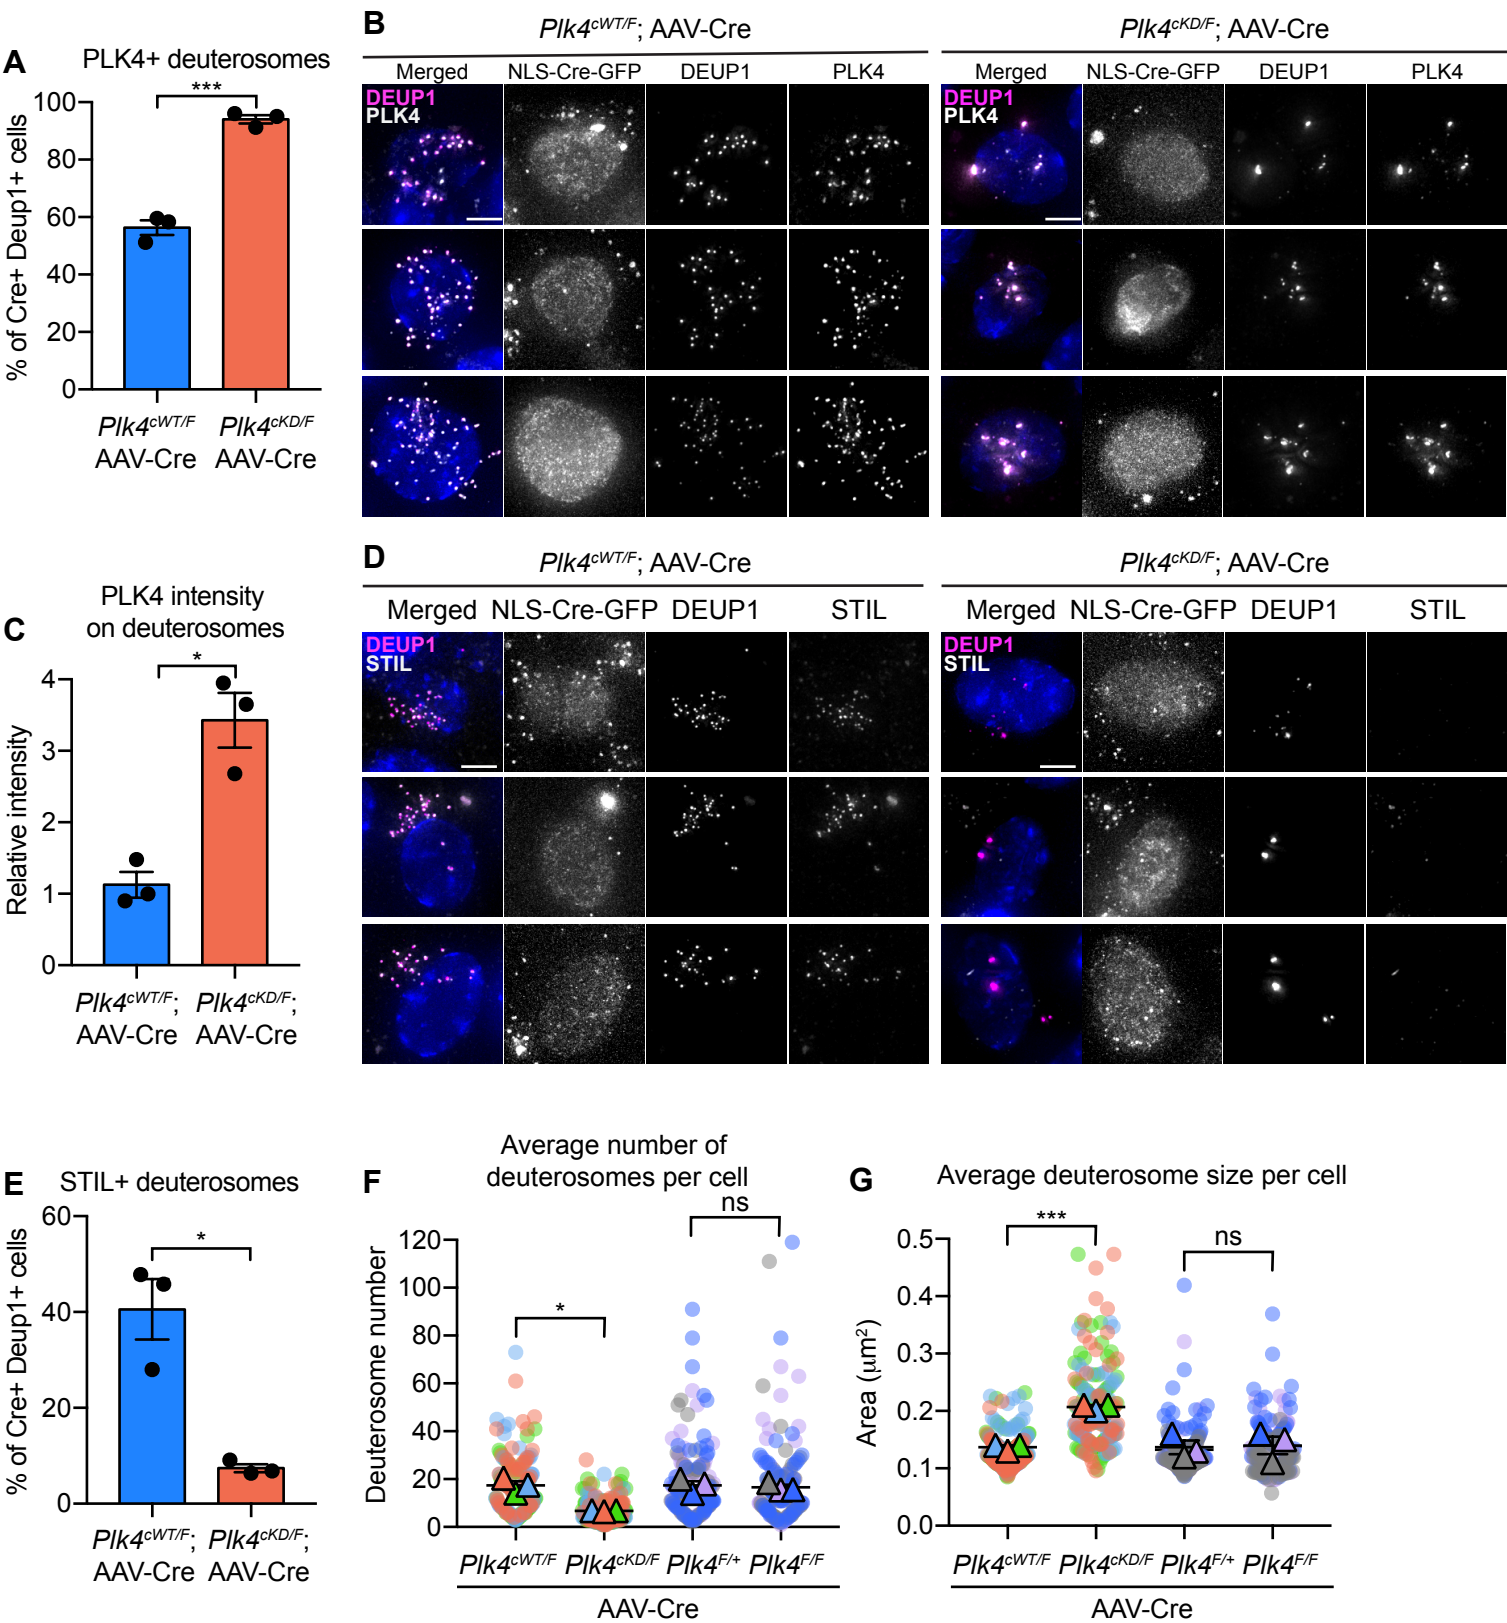

Supplement: supp [file elife-80643-supp-v1.zip]

# FIGURE 6 - FIGURE SUPPLEMENT 1

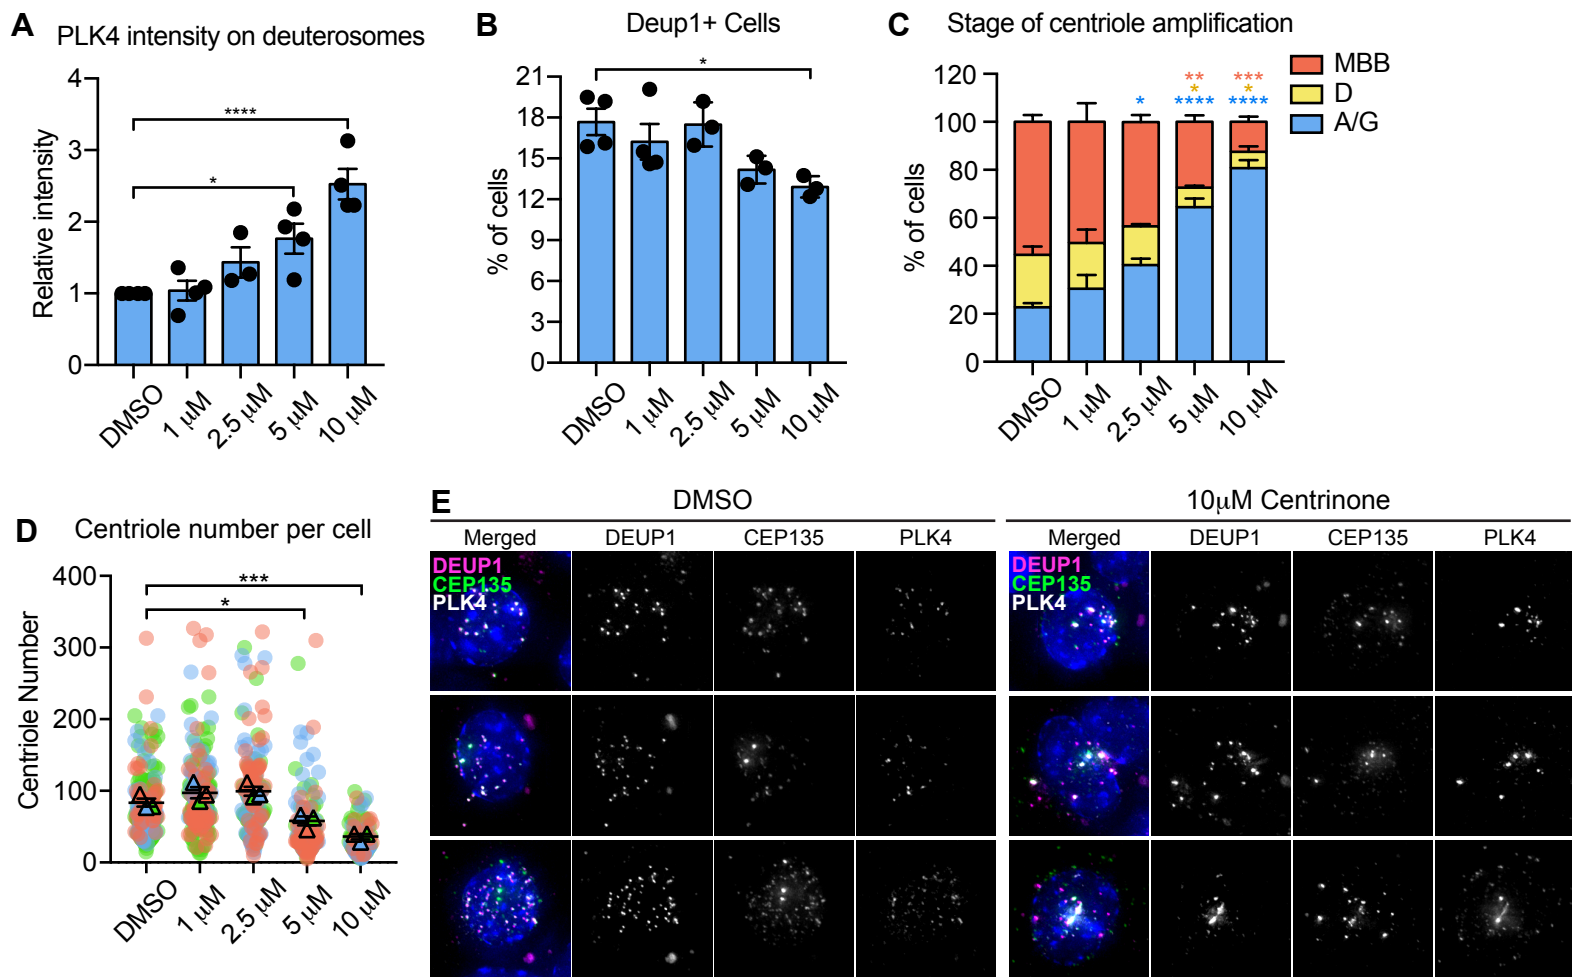

Supplement: supp [file elife-80643-supp-v1.zip]

# FIGURE 5 - FIGURE SUPPLEMENT 1

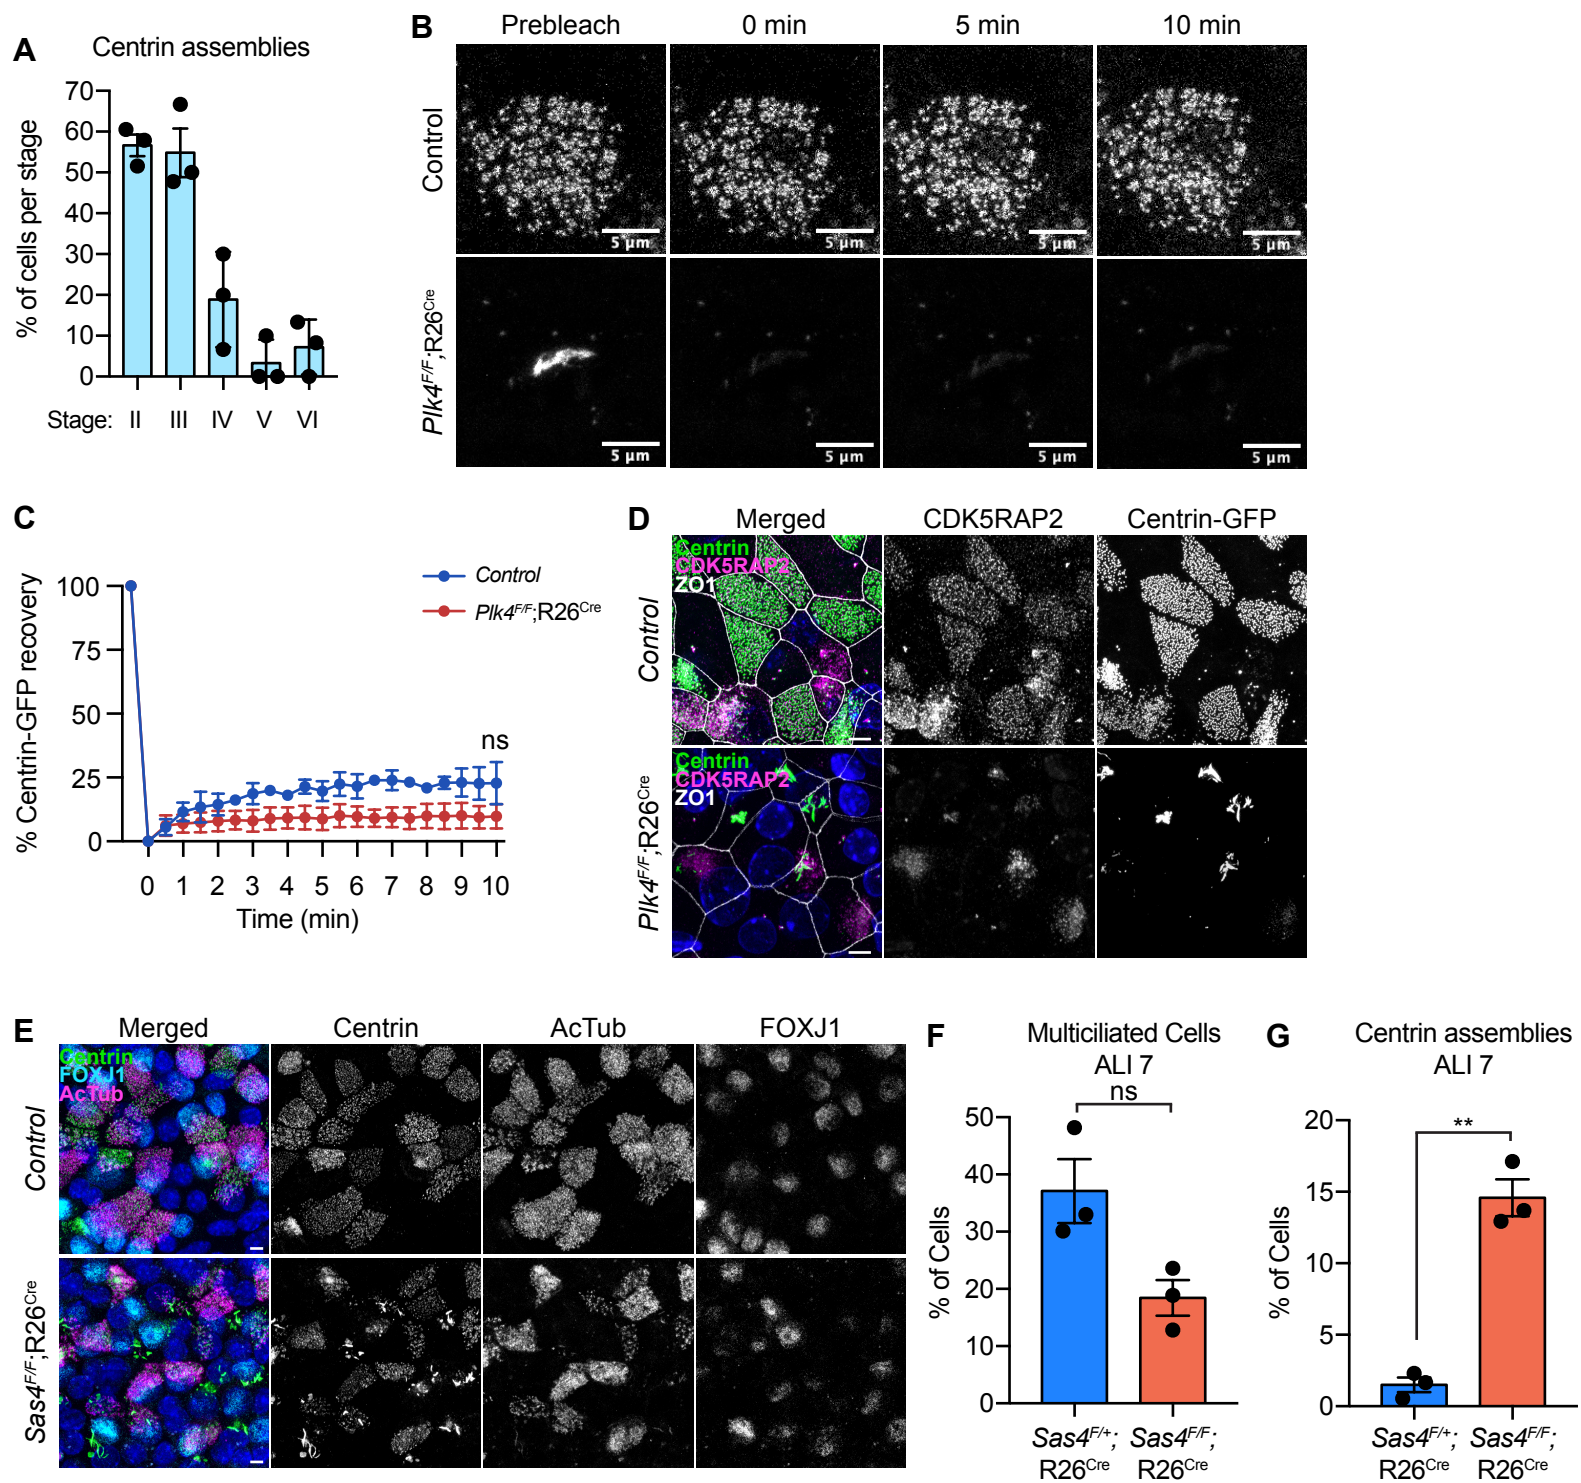

Supplement: supp [file elife-80643-supp-v1.zip]

FIGURE 2 - FIGURE SUPPLEMENT 1

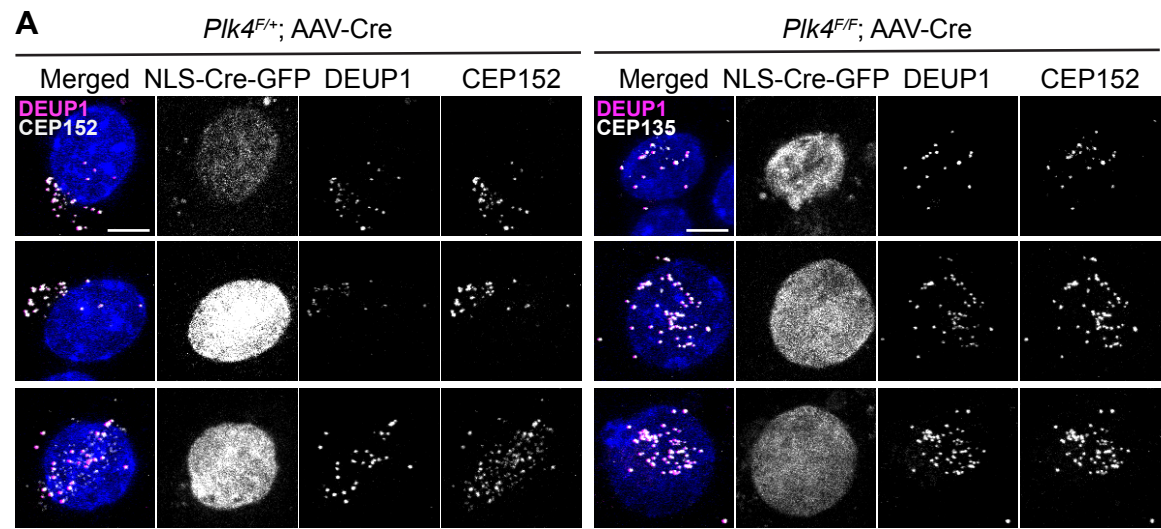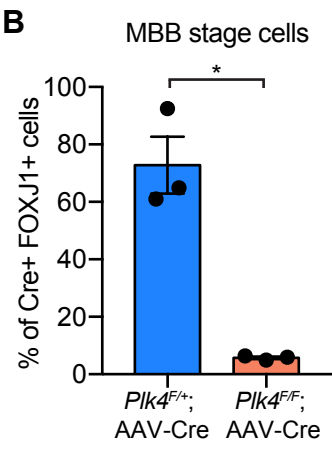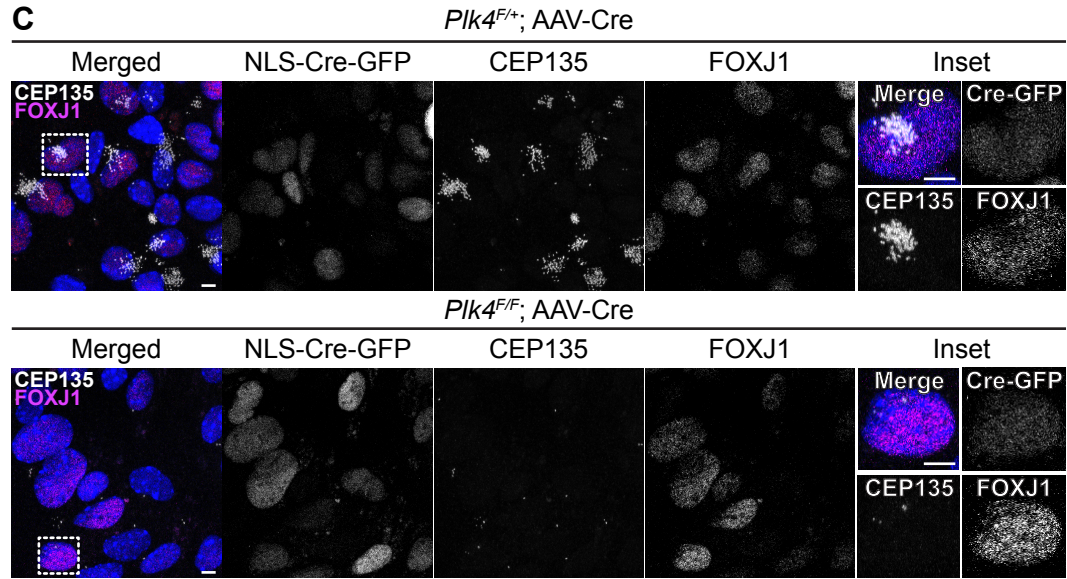

Supplement: supp [file elife-80643-supp-v1.zip]

# FIGURE 4 - FIGURE SUPPLEMENT 1

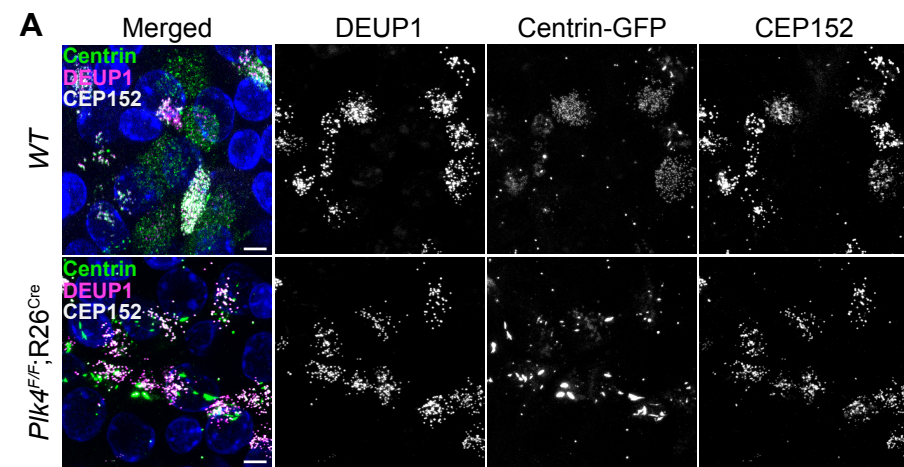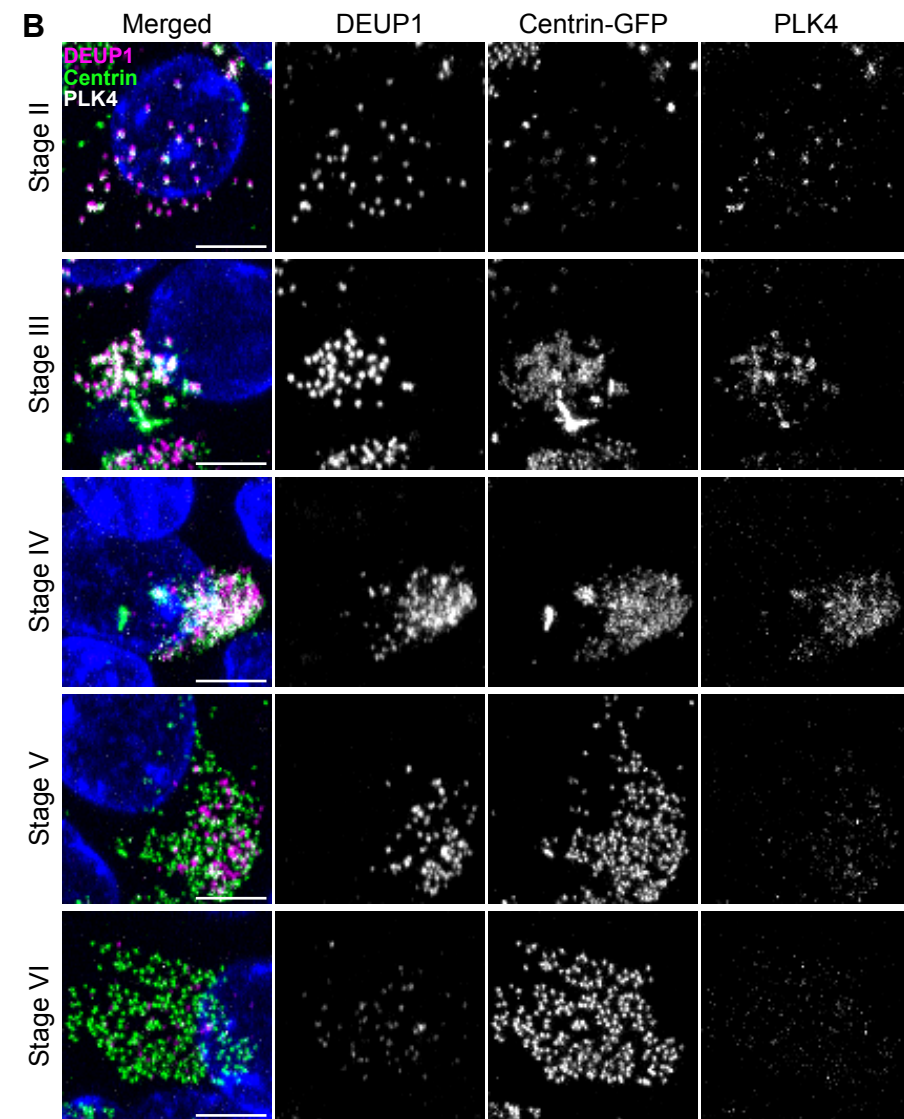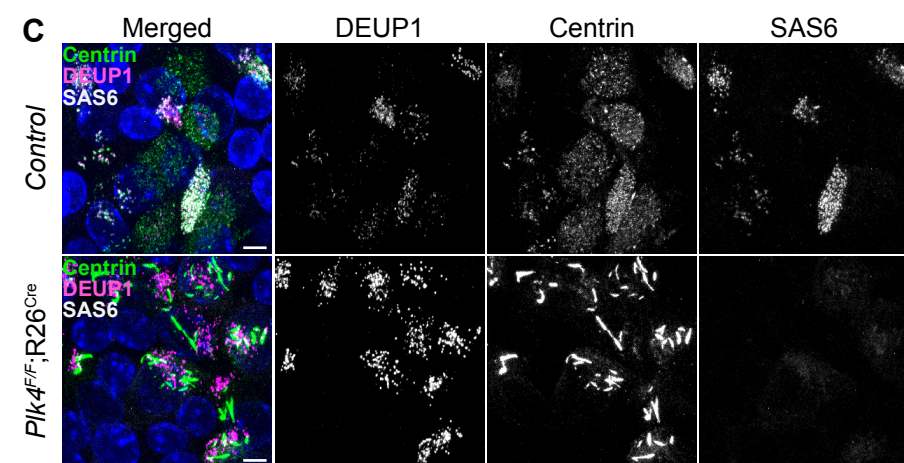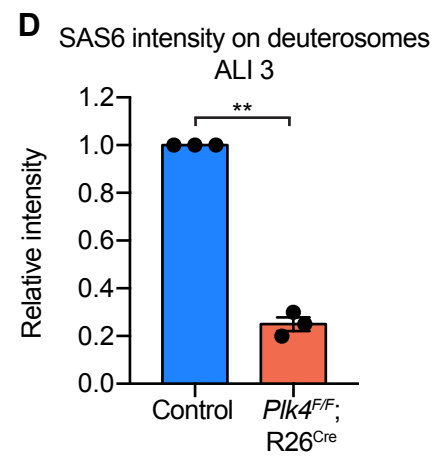

Supplement: supp [file elife-80643-supp-v1.zip]

FIGURE 1 - FIGURE SUPPLEMENT 1

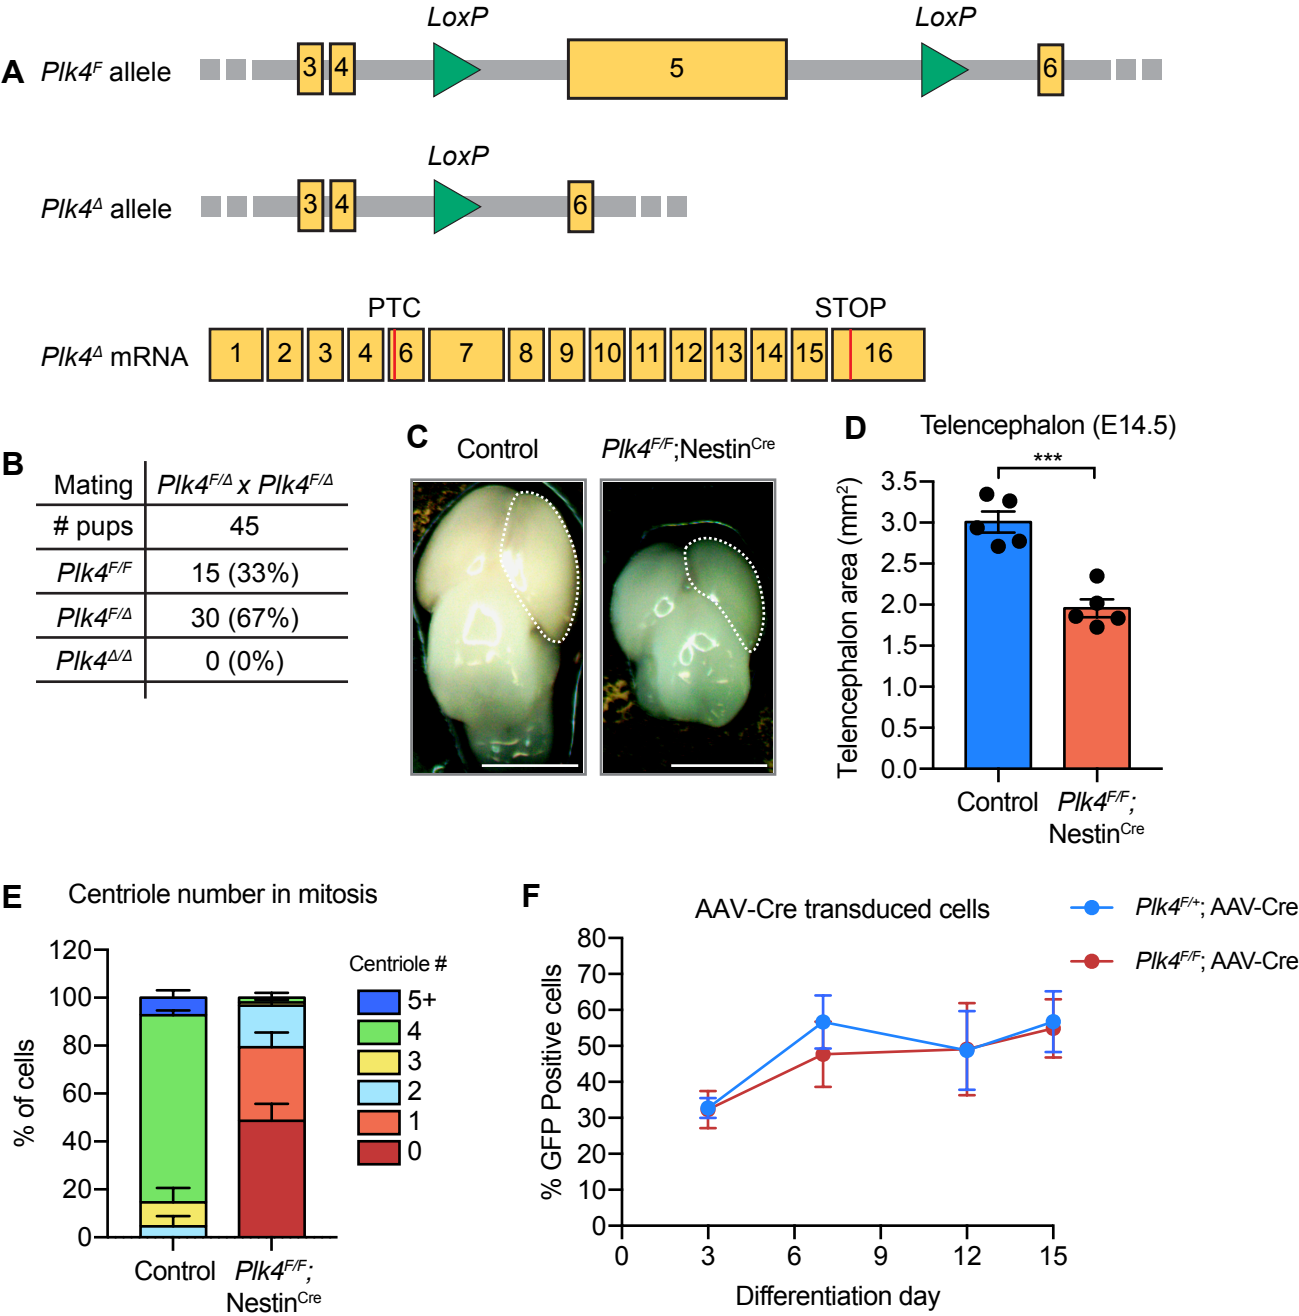

Supplement: supp [file elife-80643-supp-v1.zip]

FIGURE 6 - FIGURE SUPPLEMENT 3

A

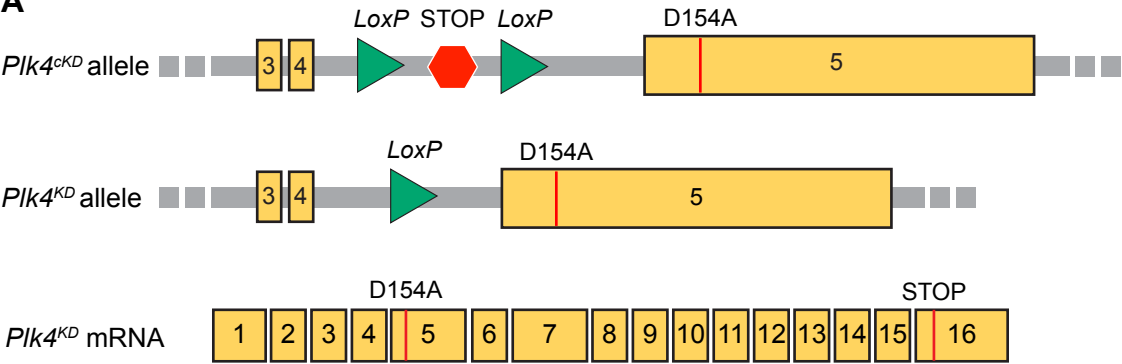

B

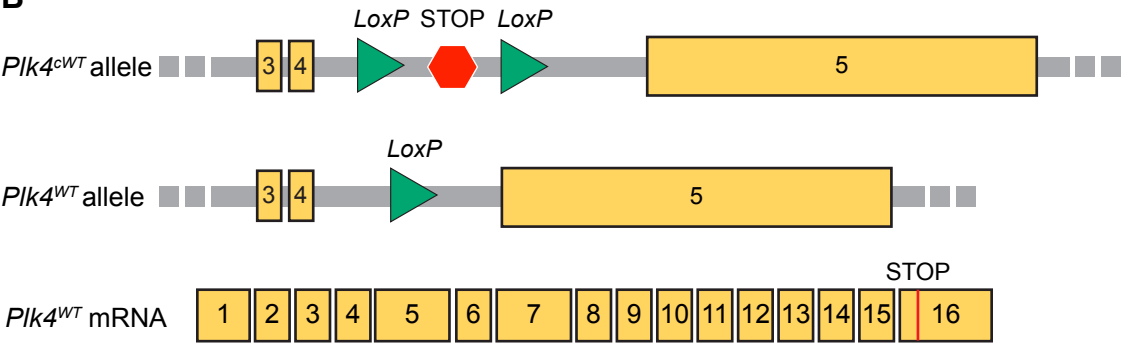

Supplement: supp [file elife-80643-supp-v1.zip]
